# Supplementary material for: Thiostrepton induces ferroptosis in pancreatic cancer cells through STAT3/GPX4 signalling
Source: PubMed Central journal article supplement (PMC9300693; doi:10.1038/s41419-022-05082-3), 2022-07-20

# Fig 1C

## FOXM1

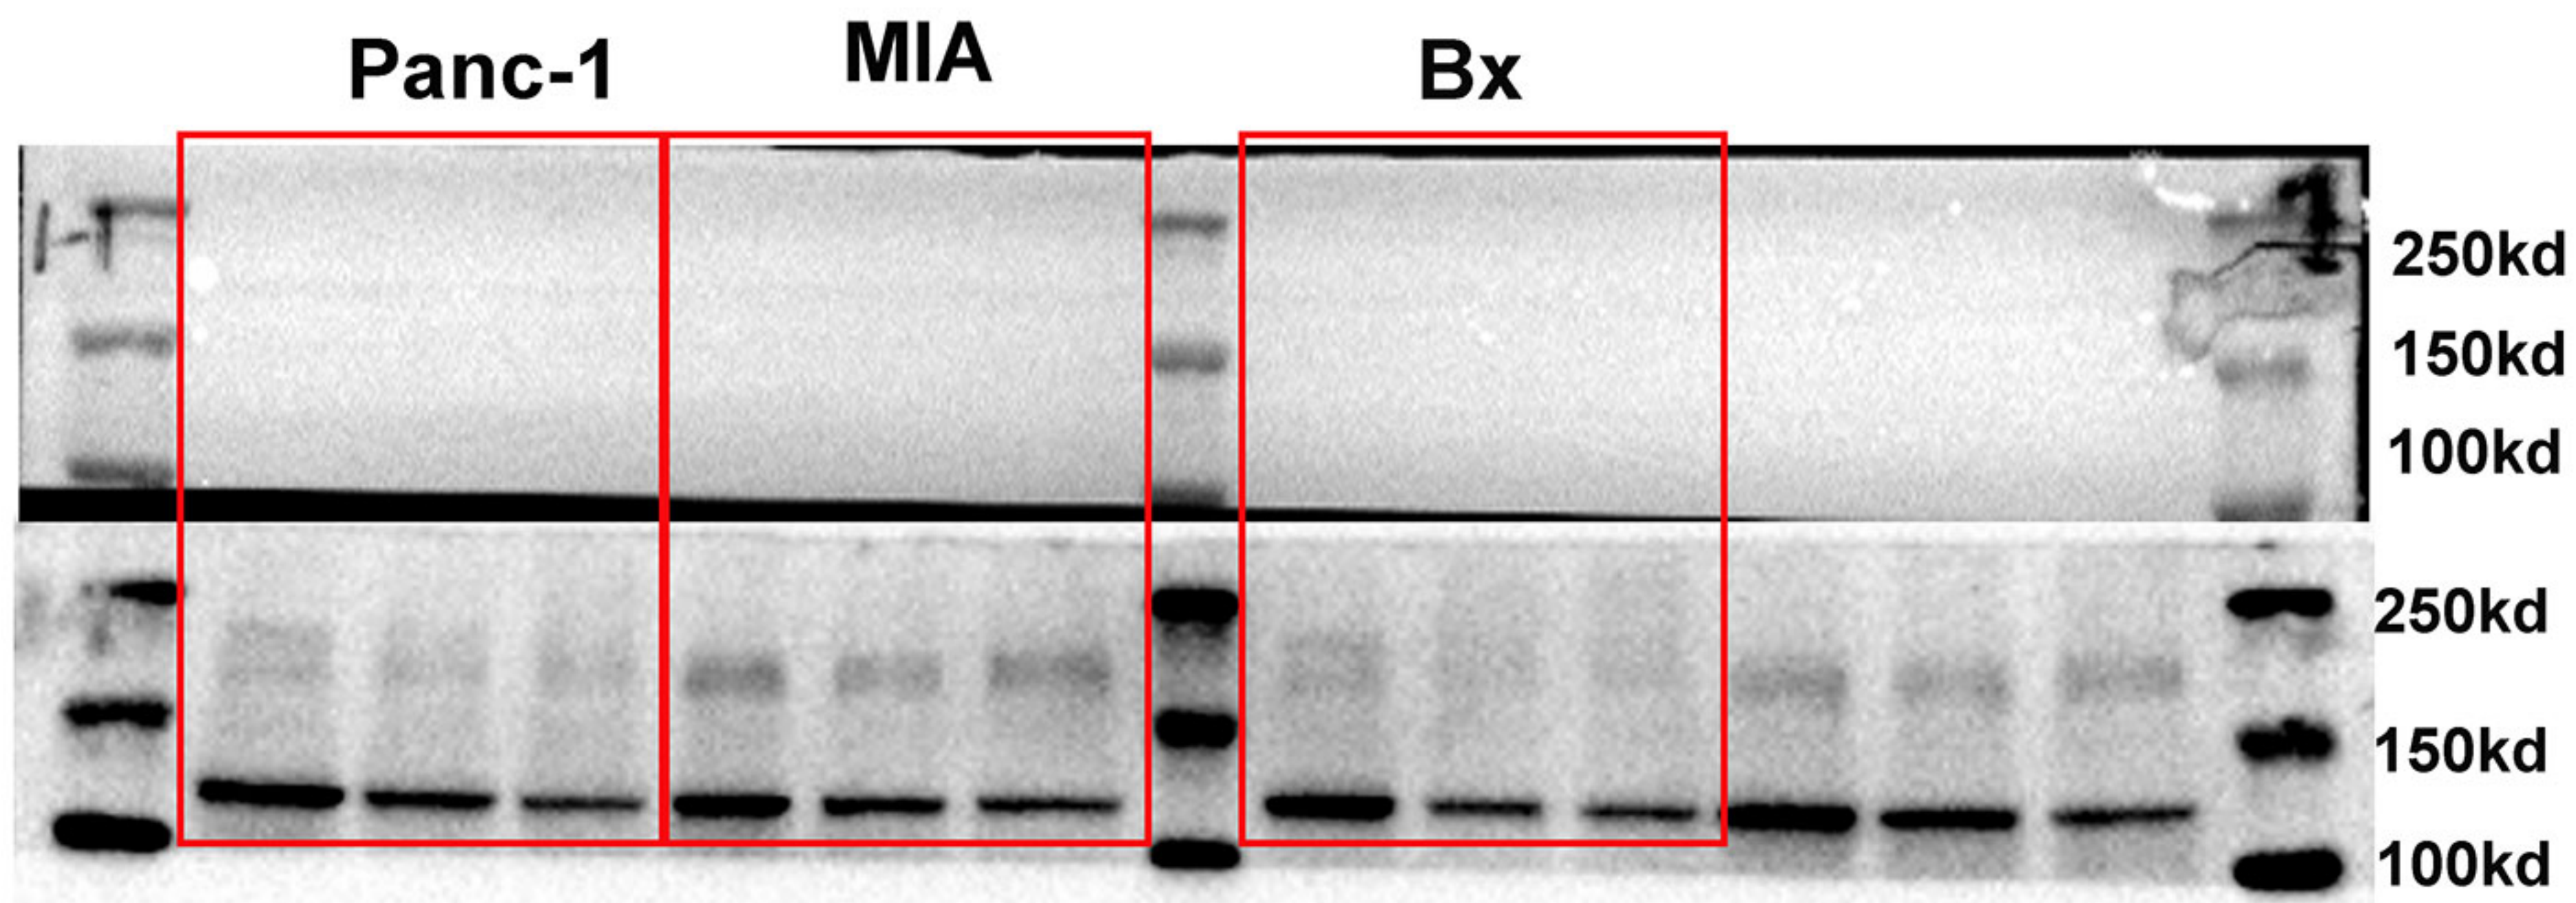

## $\beta$ -Actin

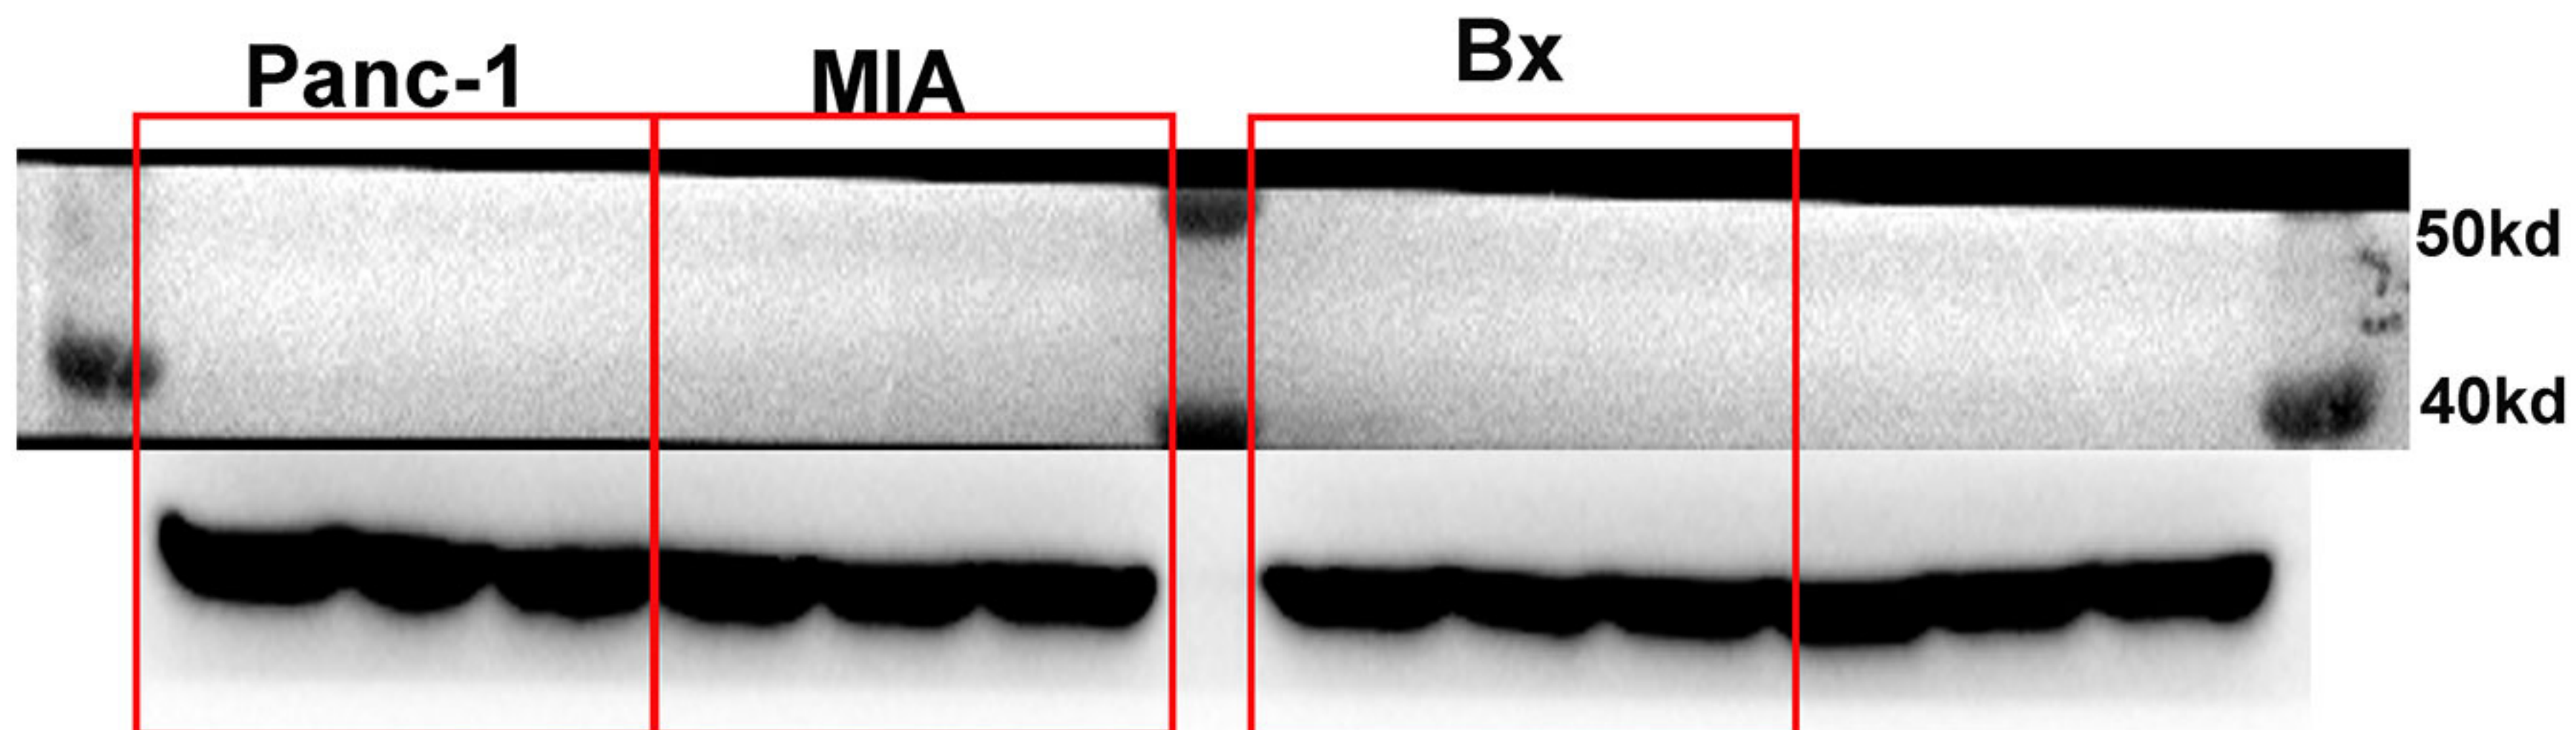

**Fig 3A**

**FOXM1**

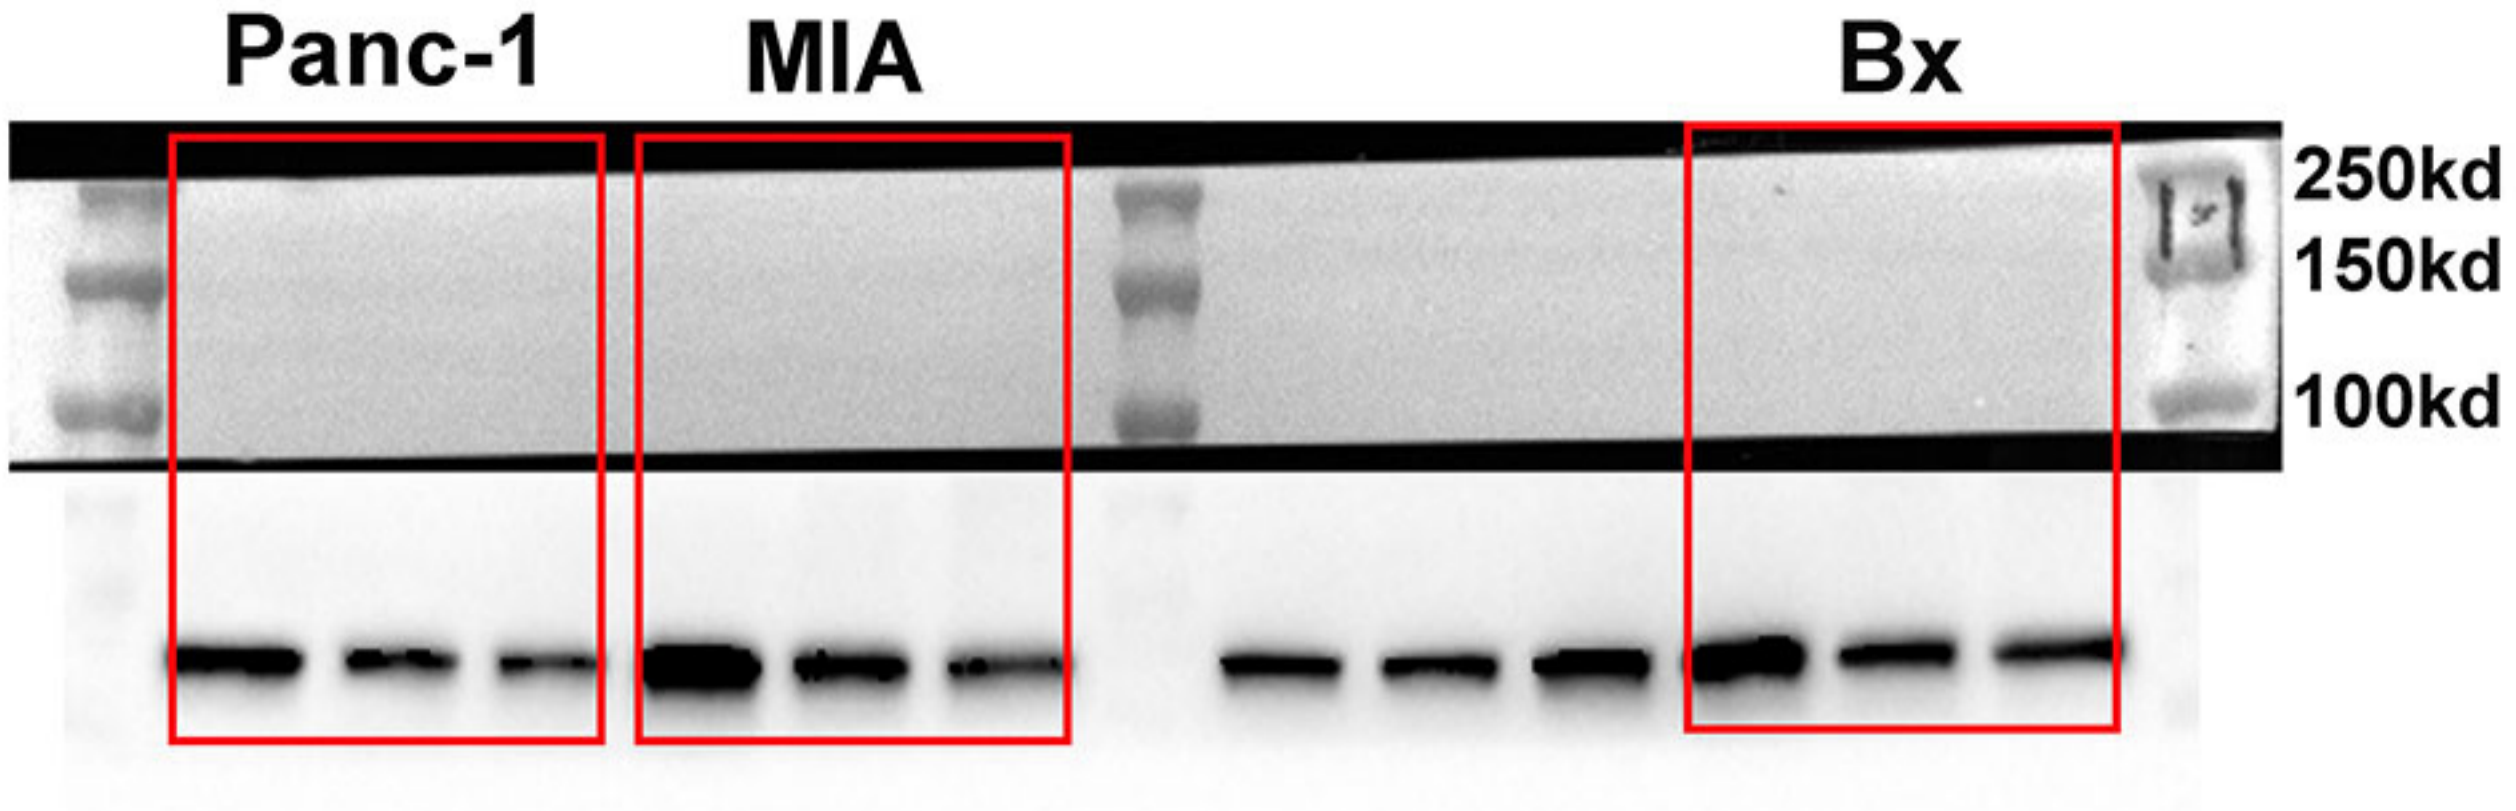

**SLC7A11**

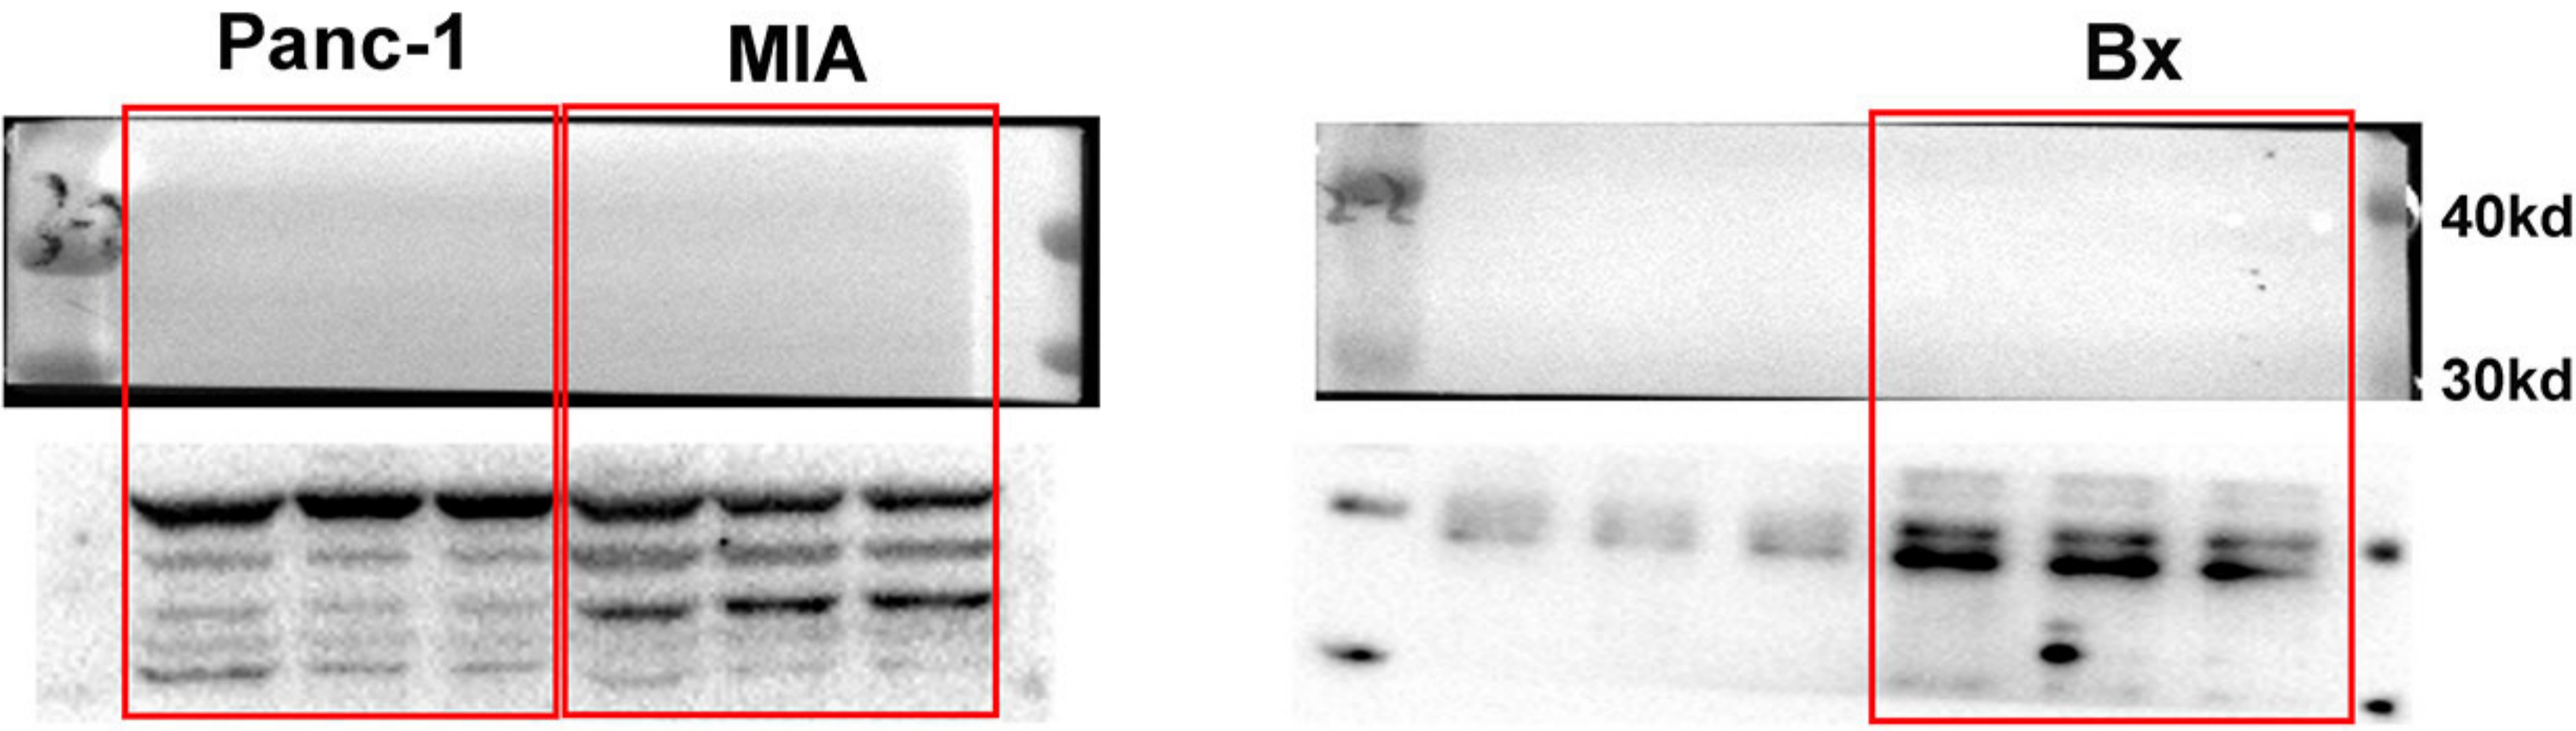

**GPX4**

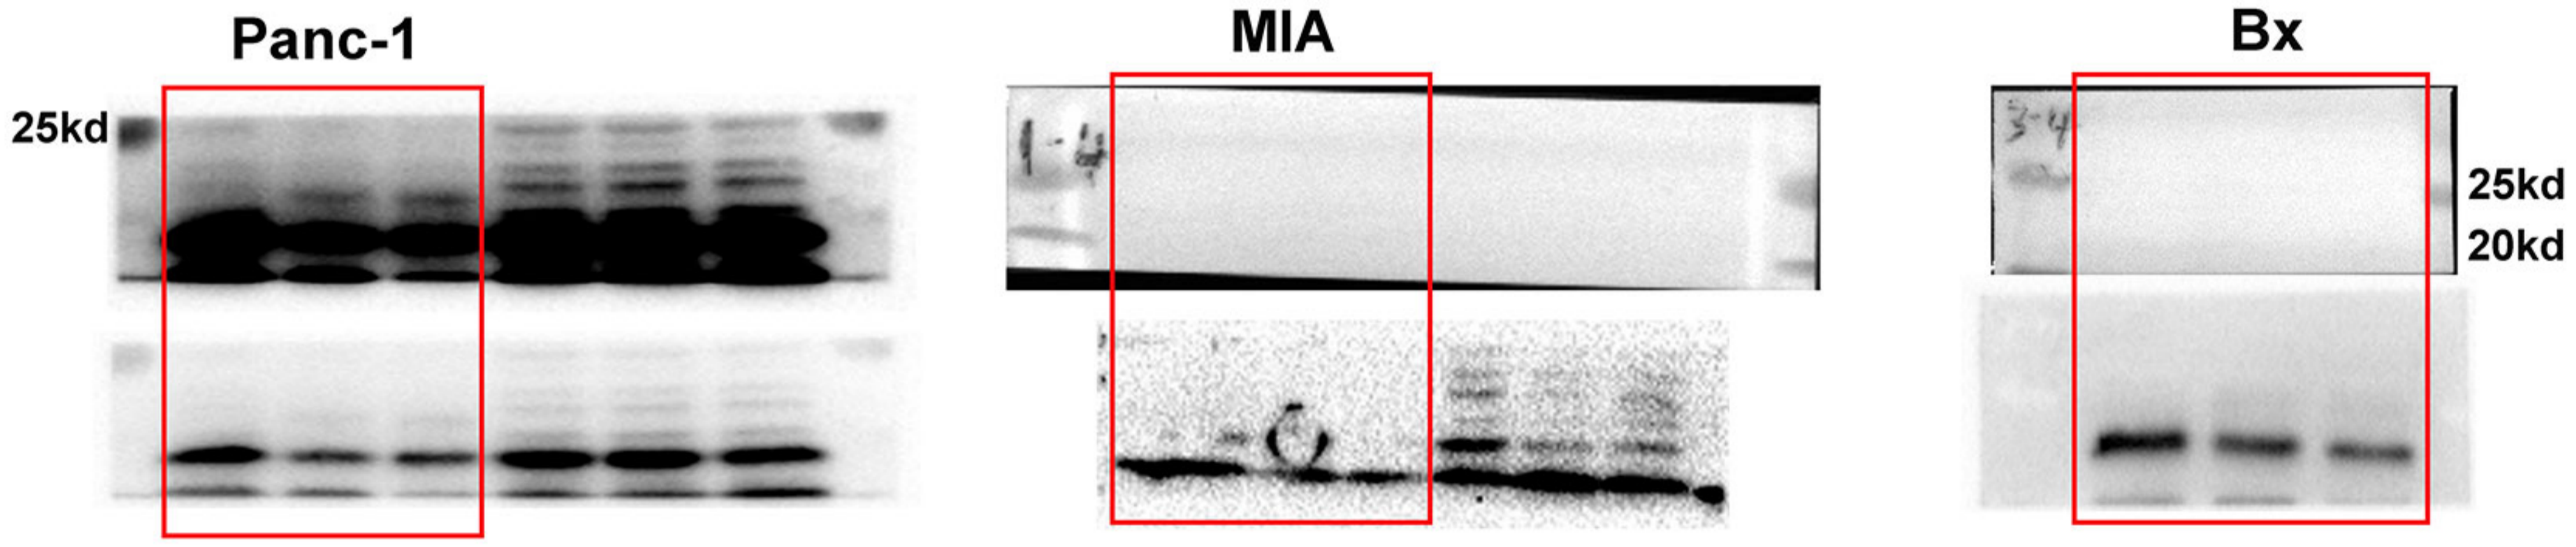

**$\beta$ -Actin**

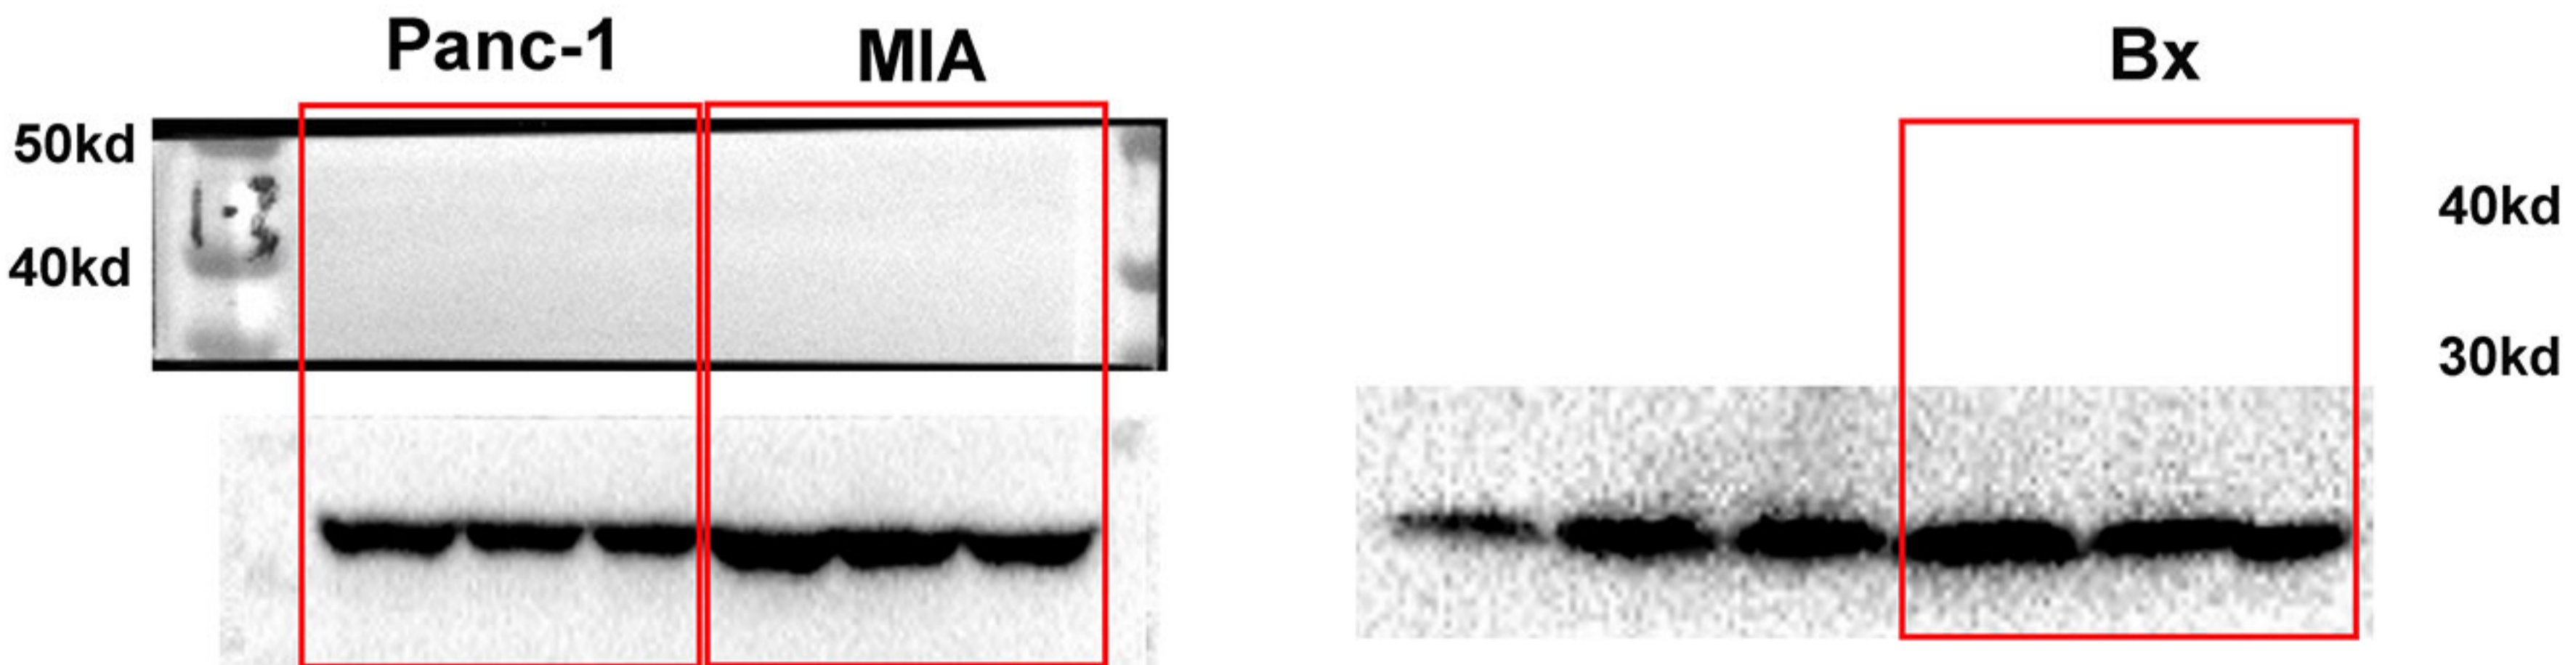

**Fig 3C**

**STAT3**

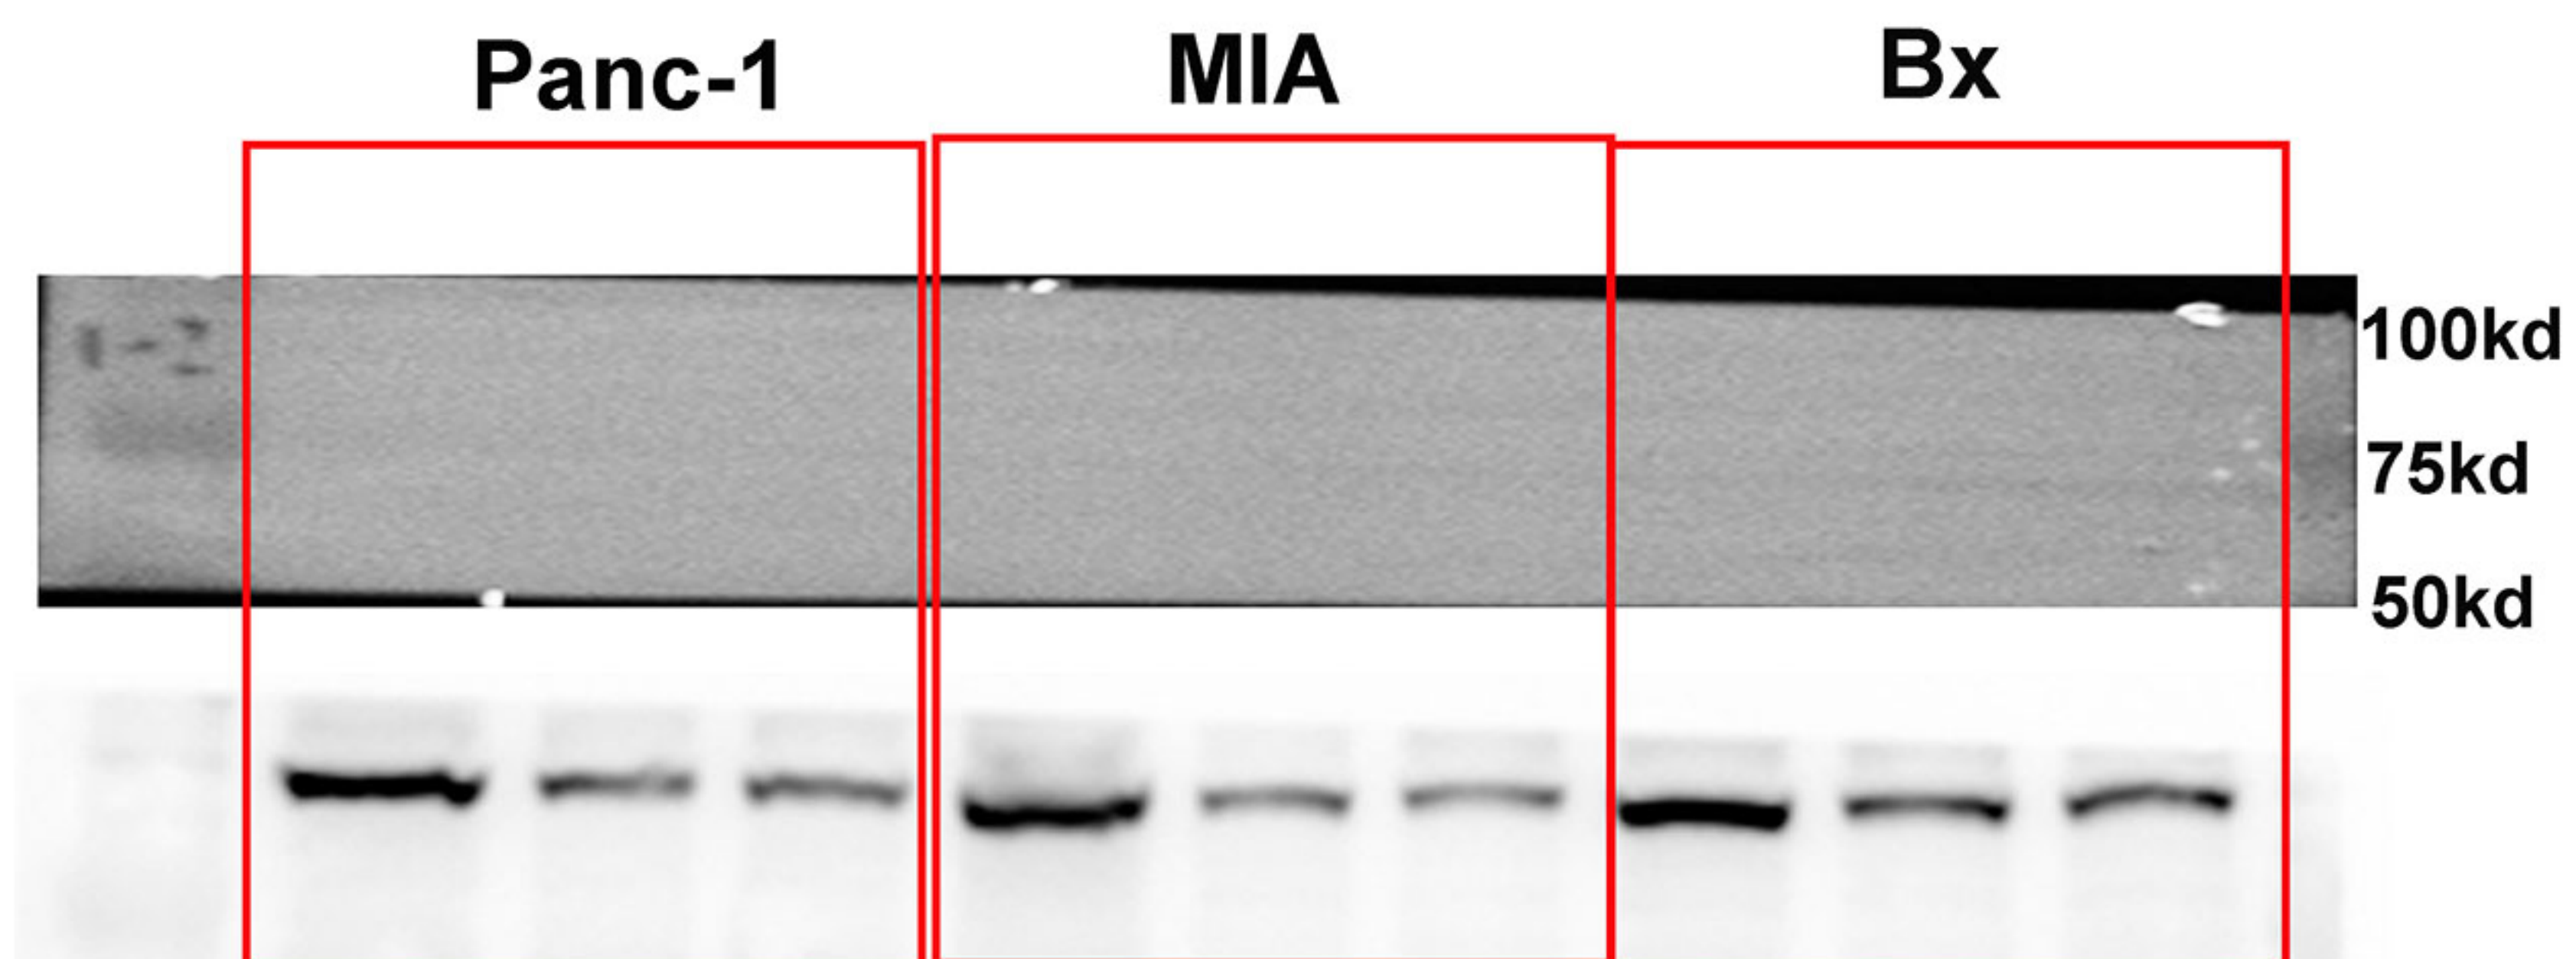

**p-STAT3**

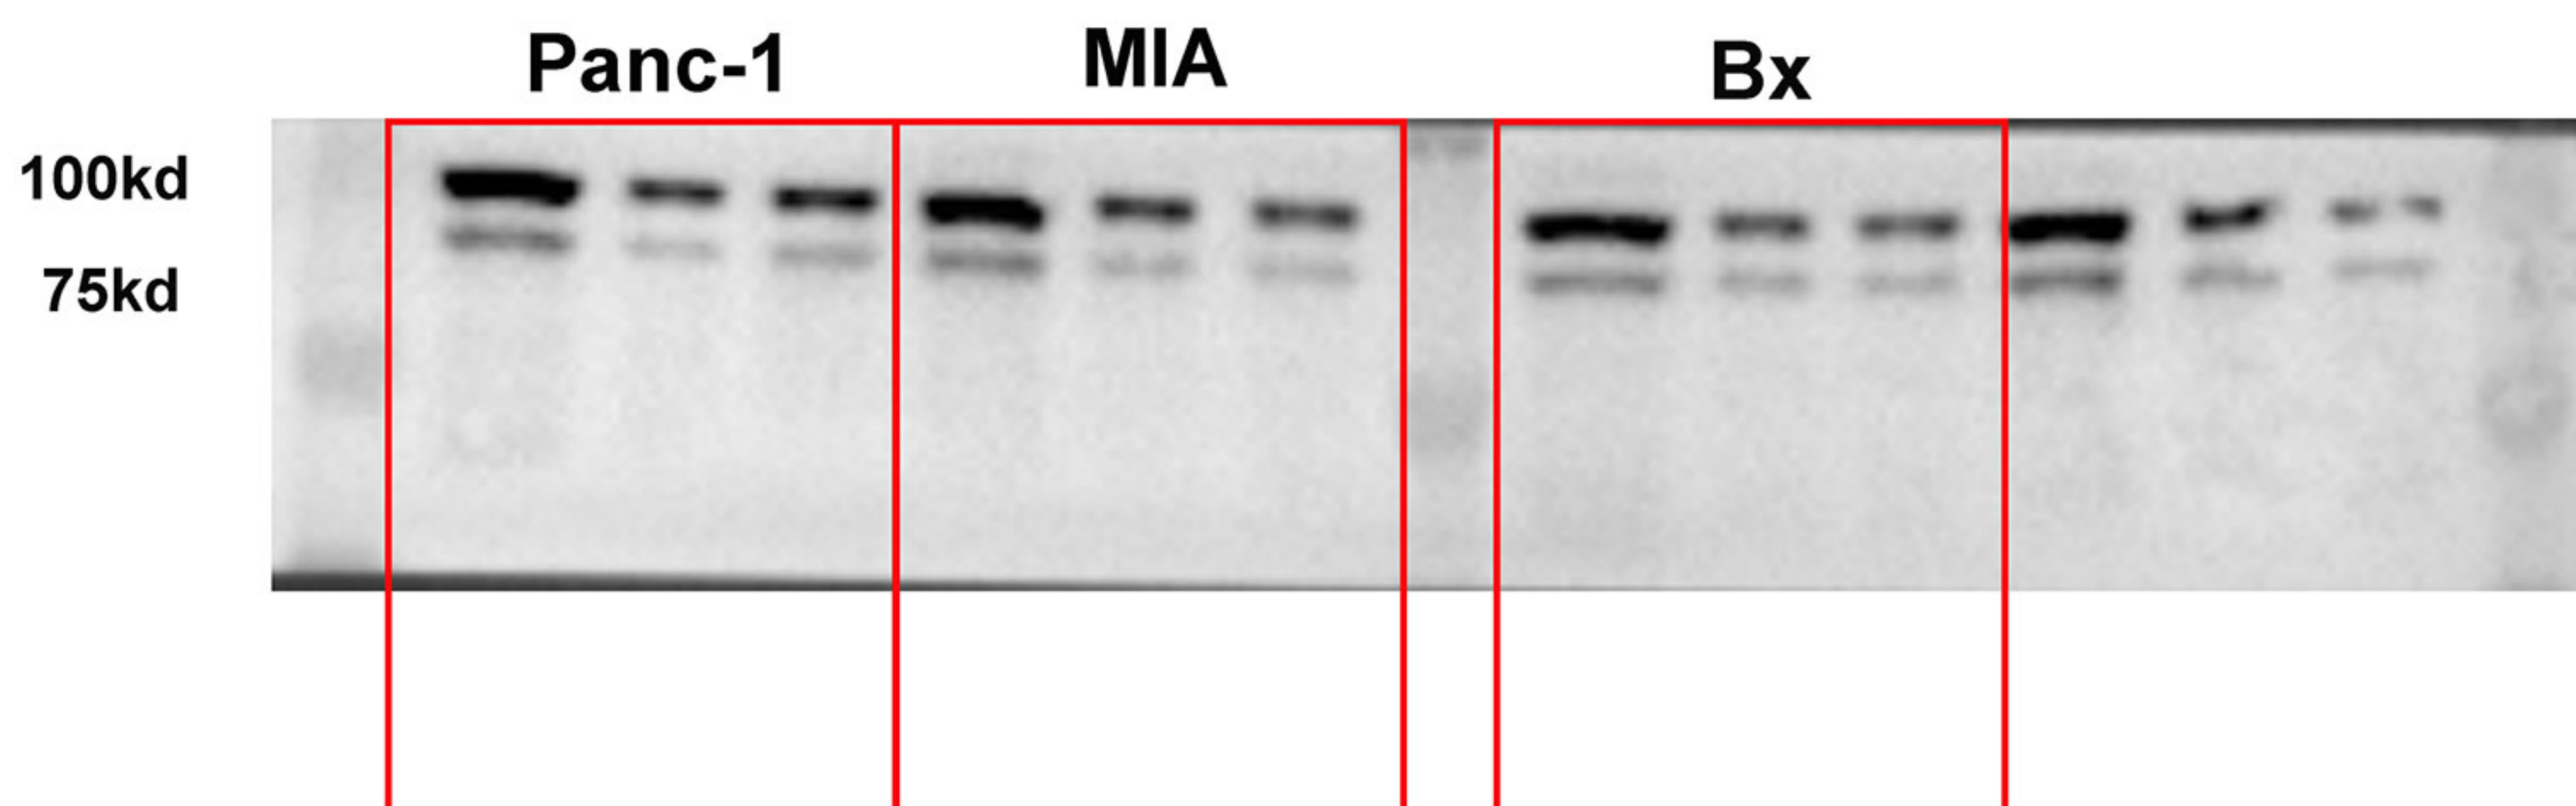

**$\beta$ -Actin**

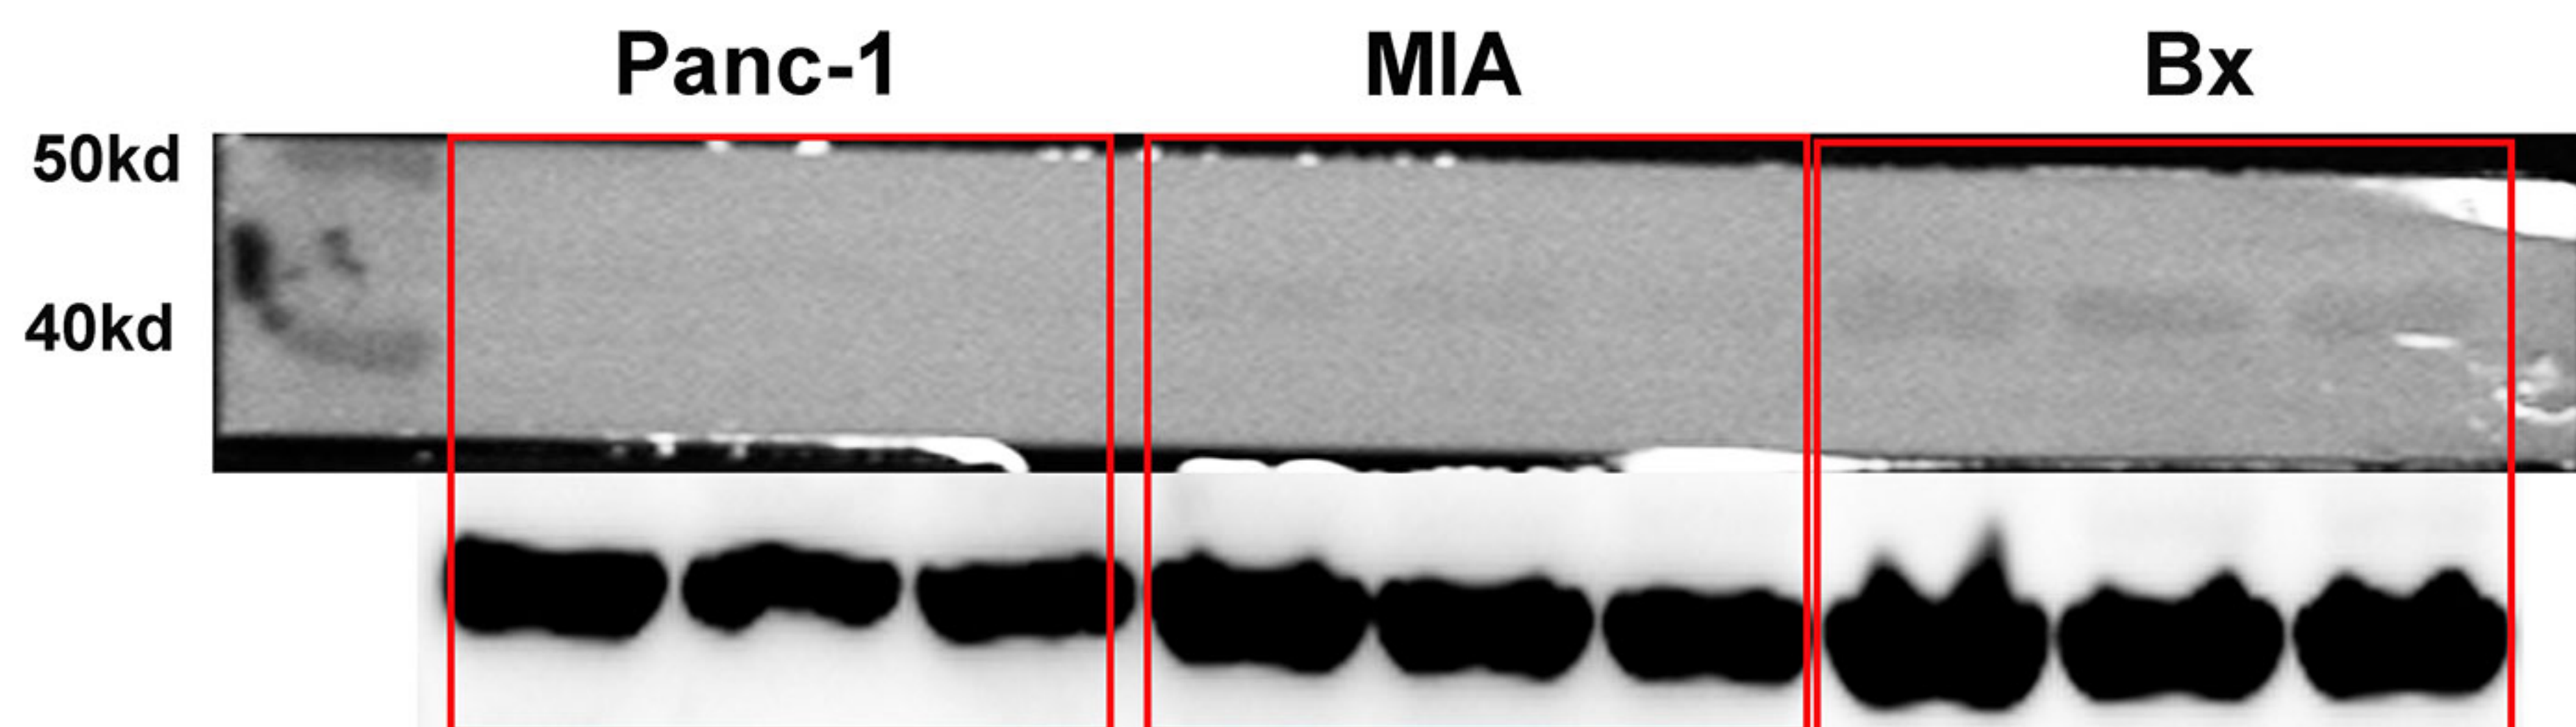

**Fig 3E**

**STAT3**

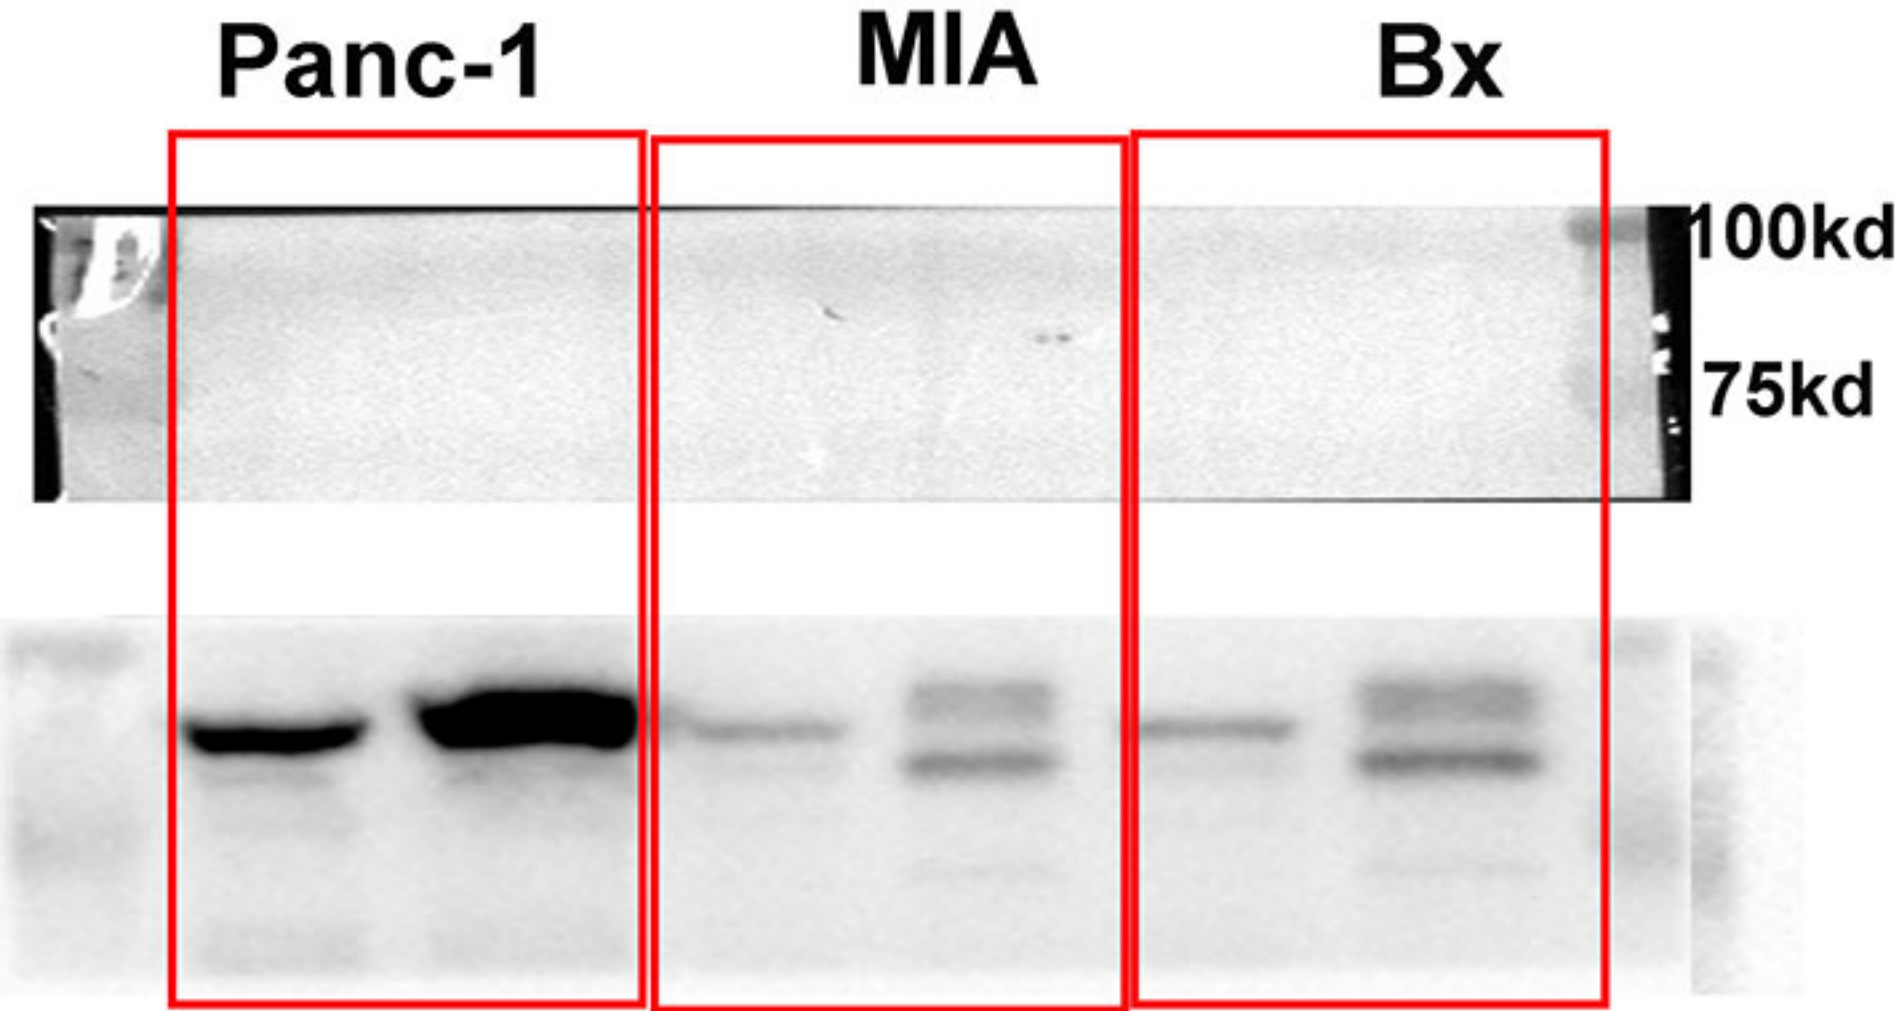

**p-STAT3**

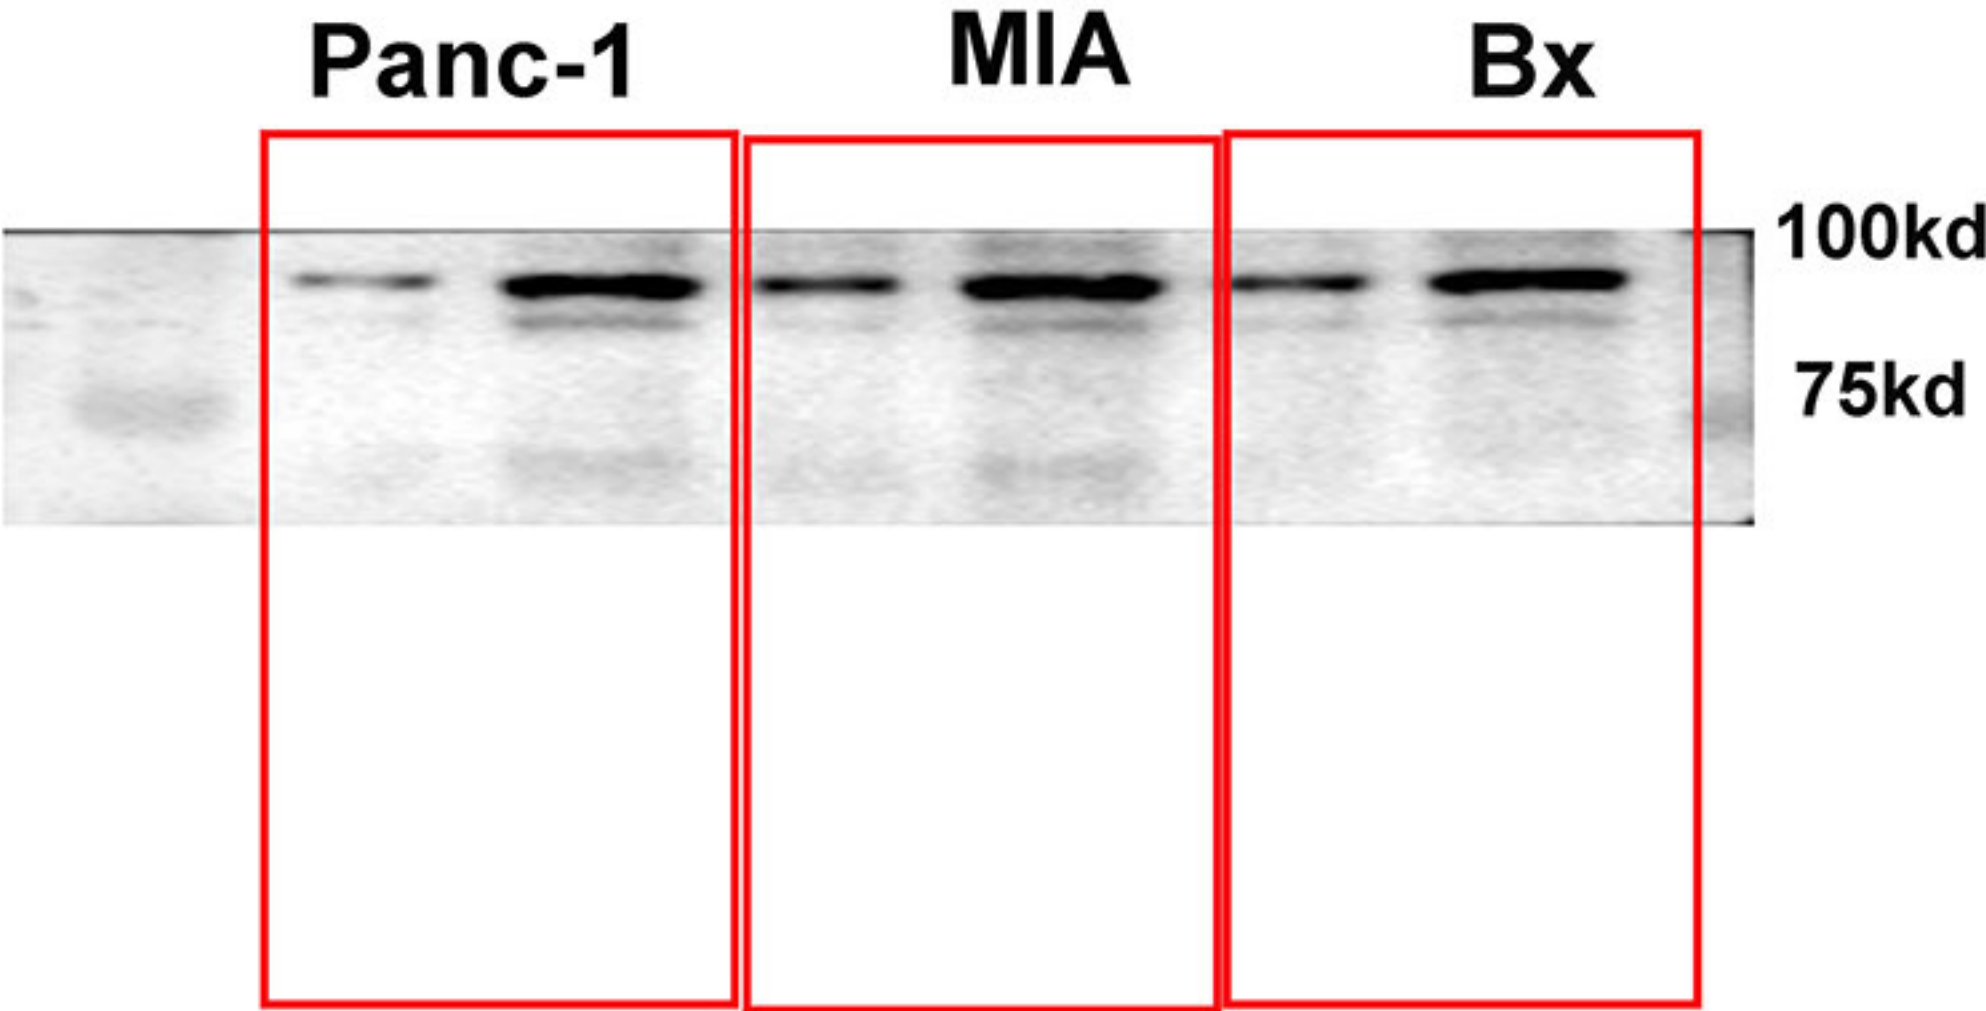

**$\beta$ -Actin**

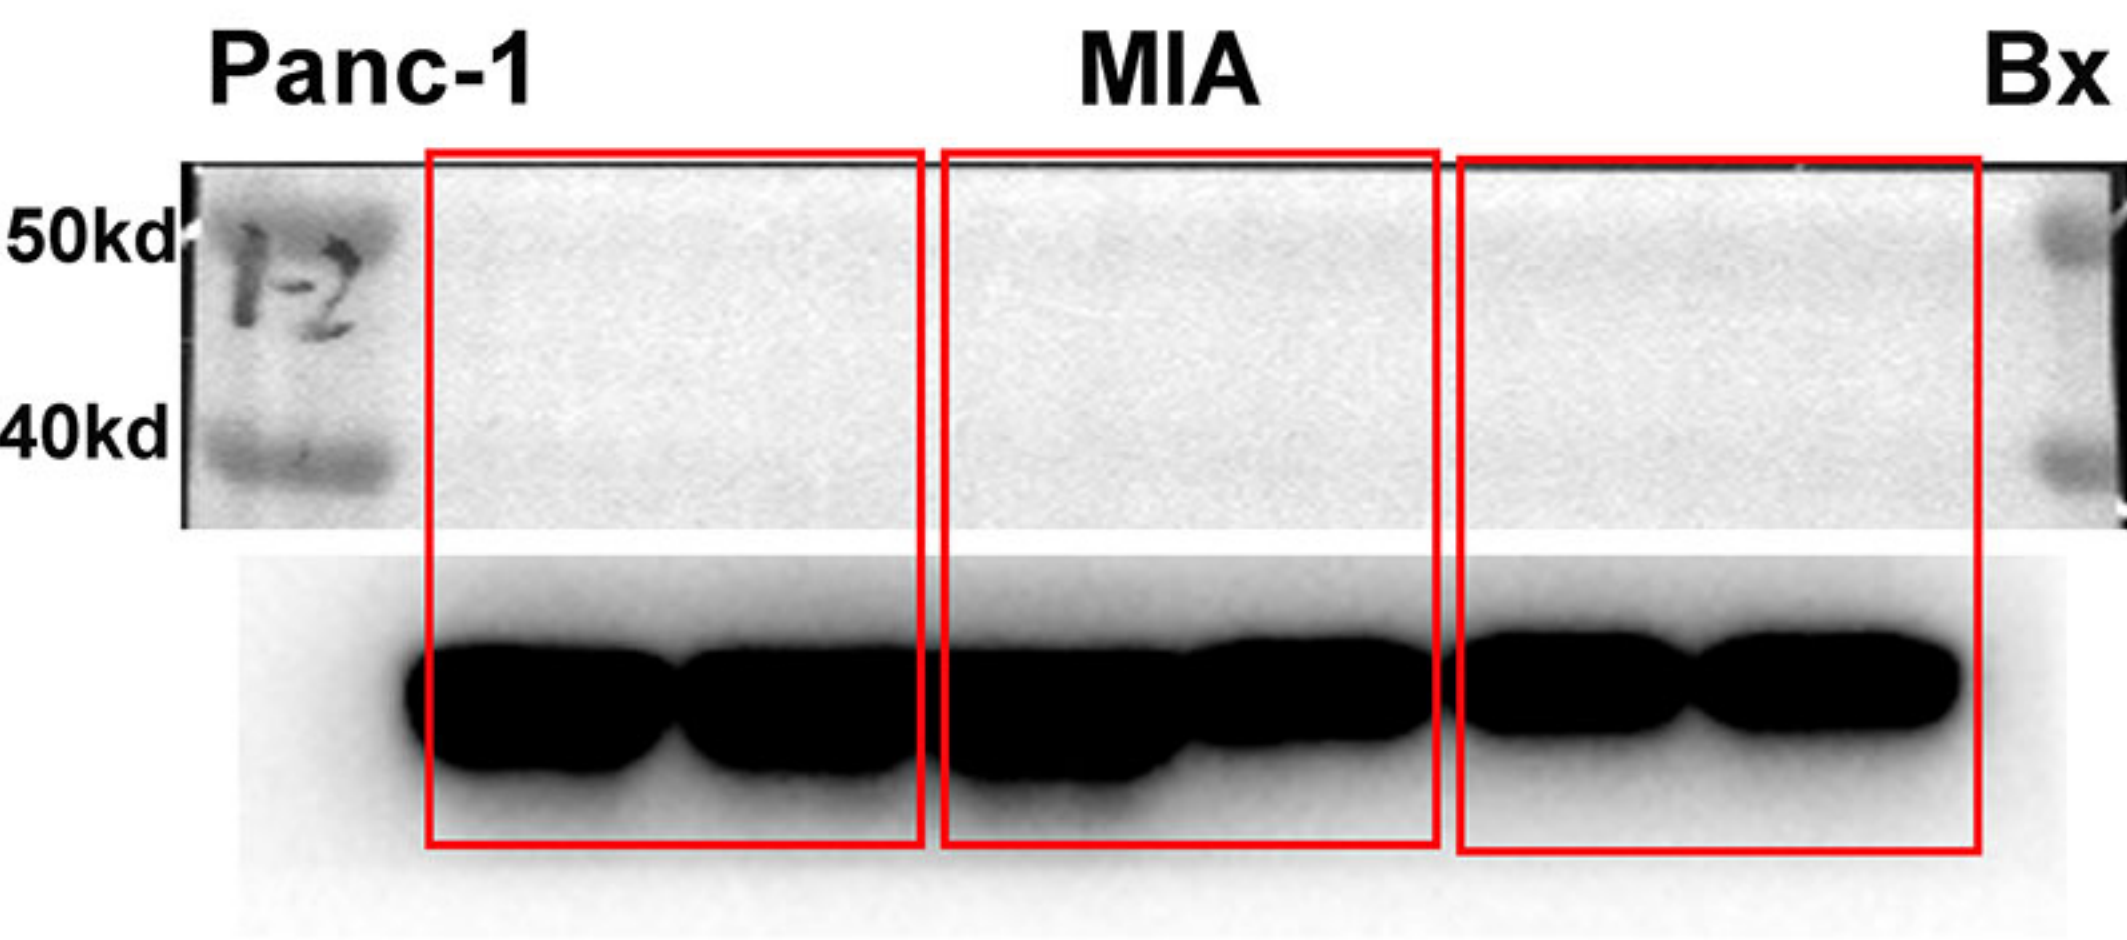

**GPX4**

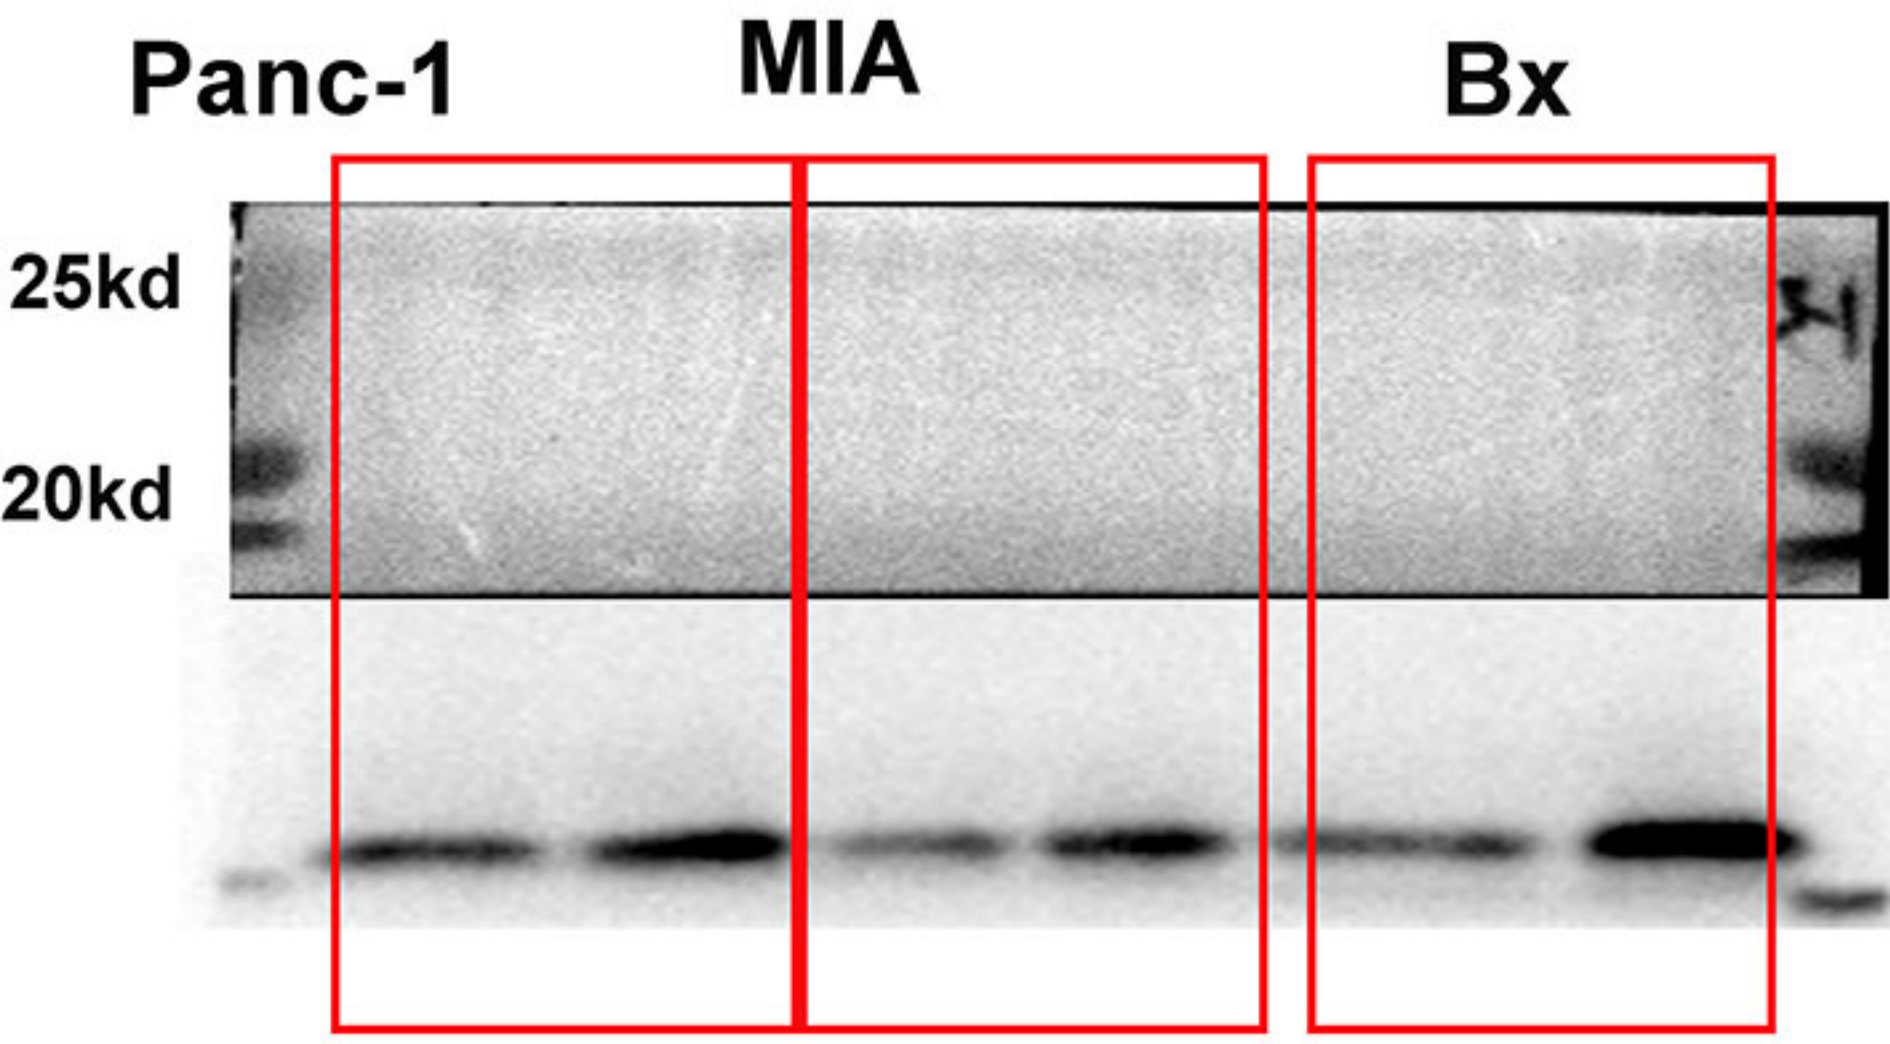

**Fig 4B**

**STAT3**

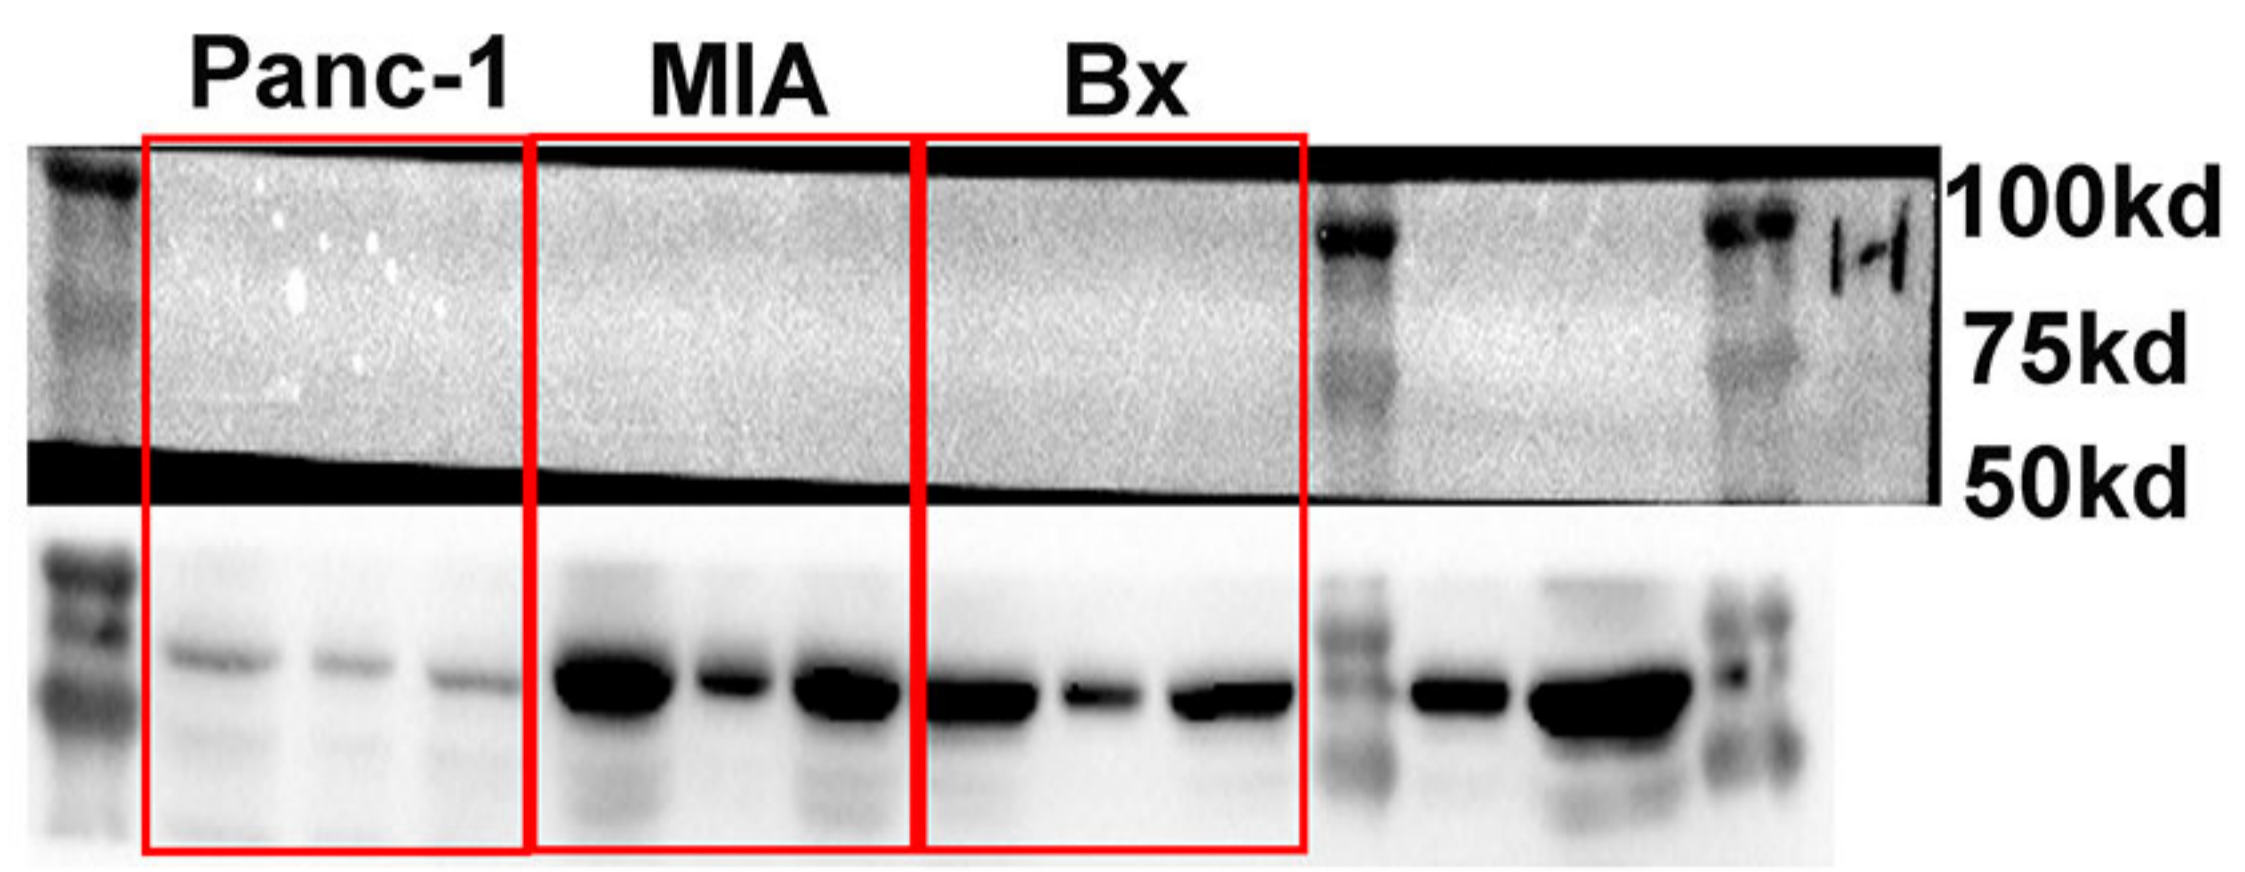

**p-STAT3**

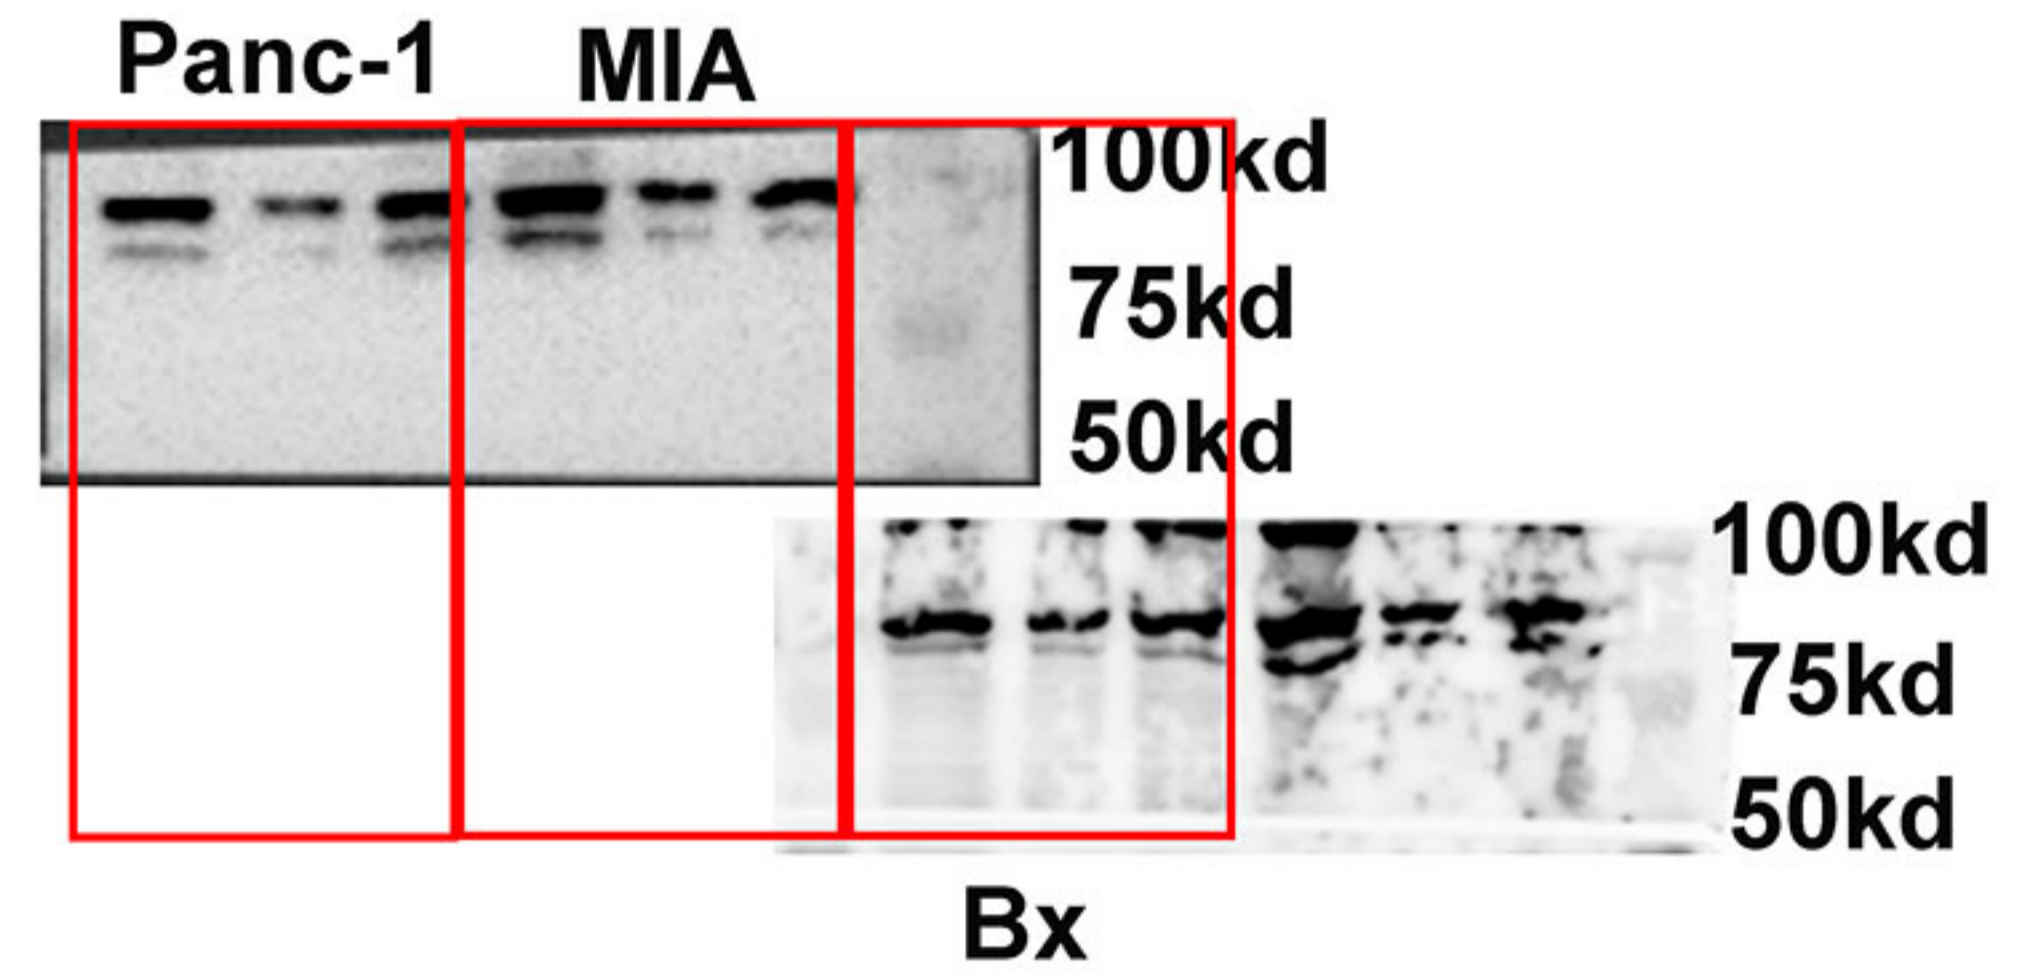

**$\beta$ -Actin**

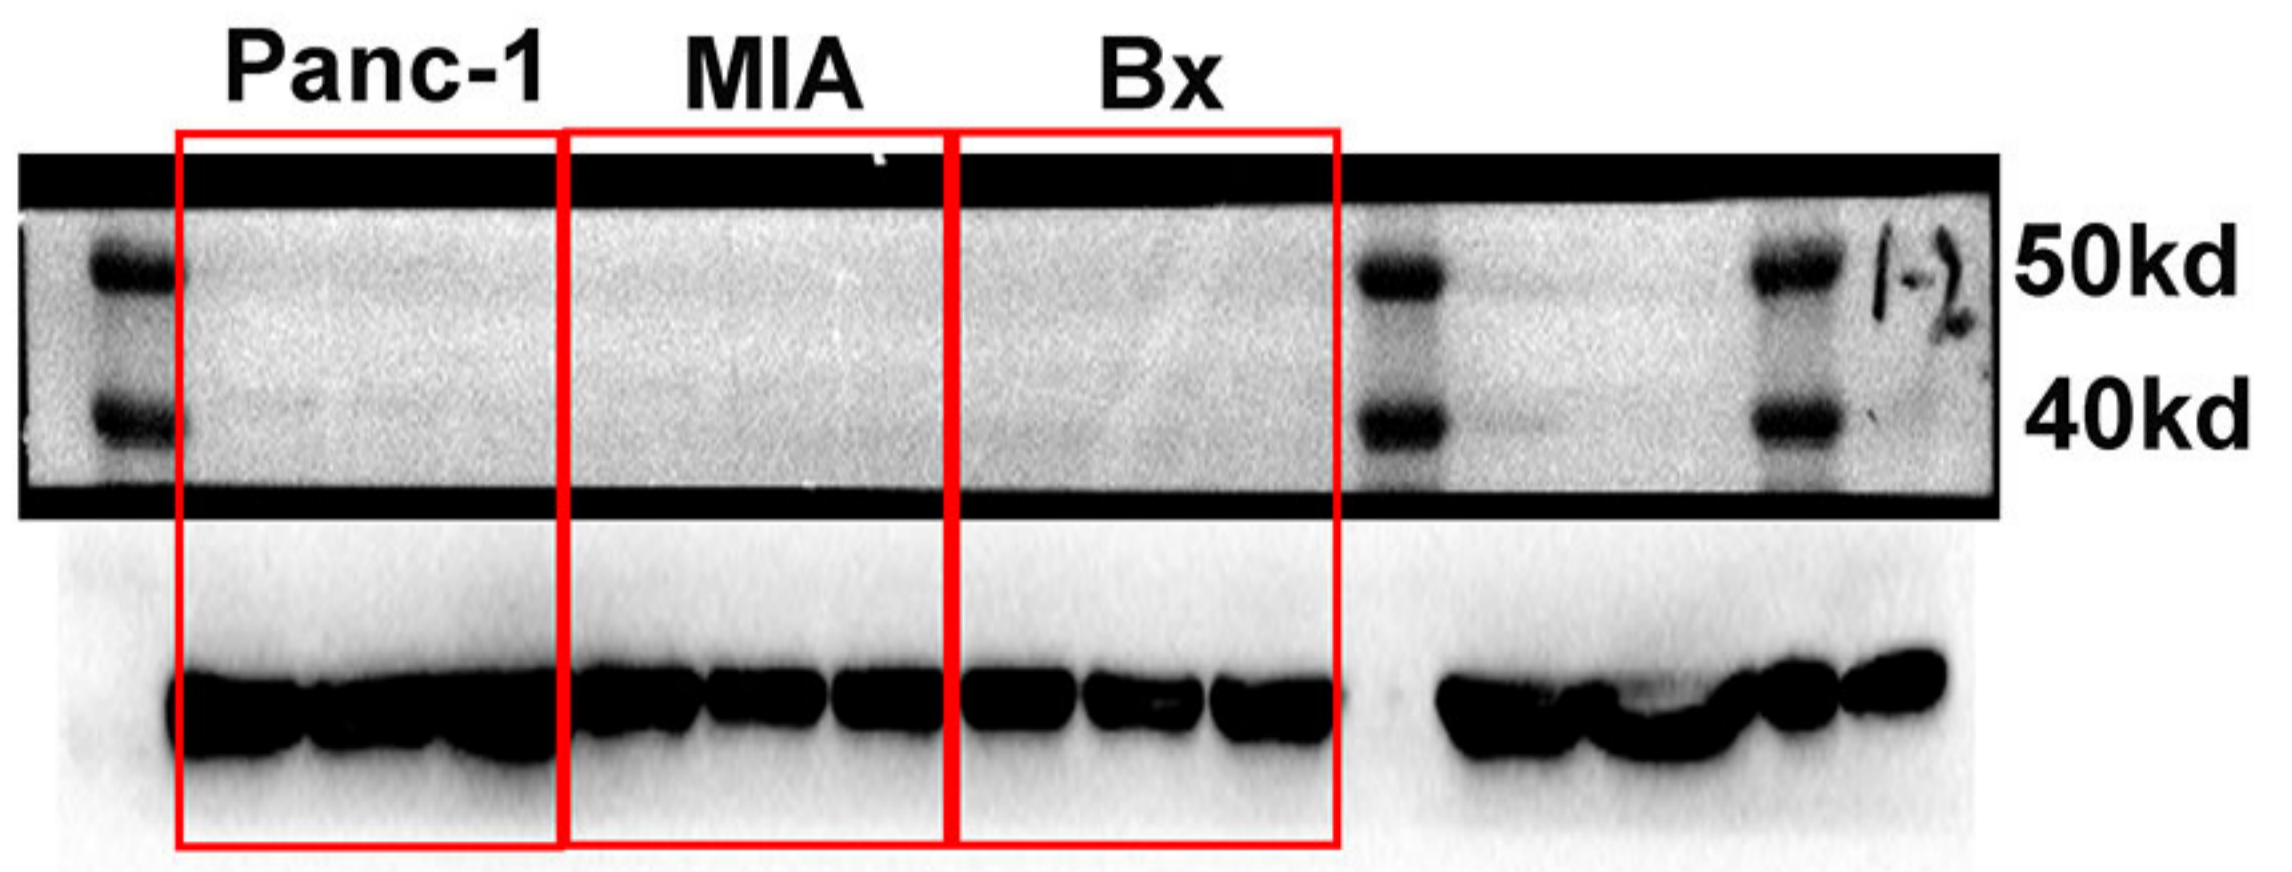

**GPX4**

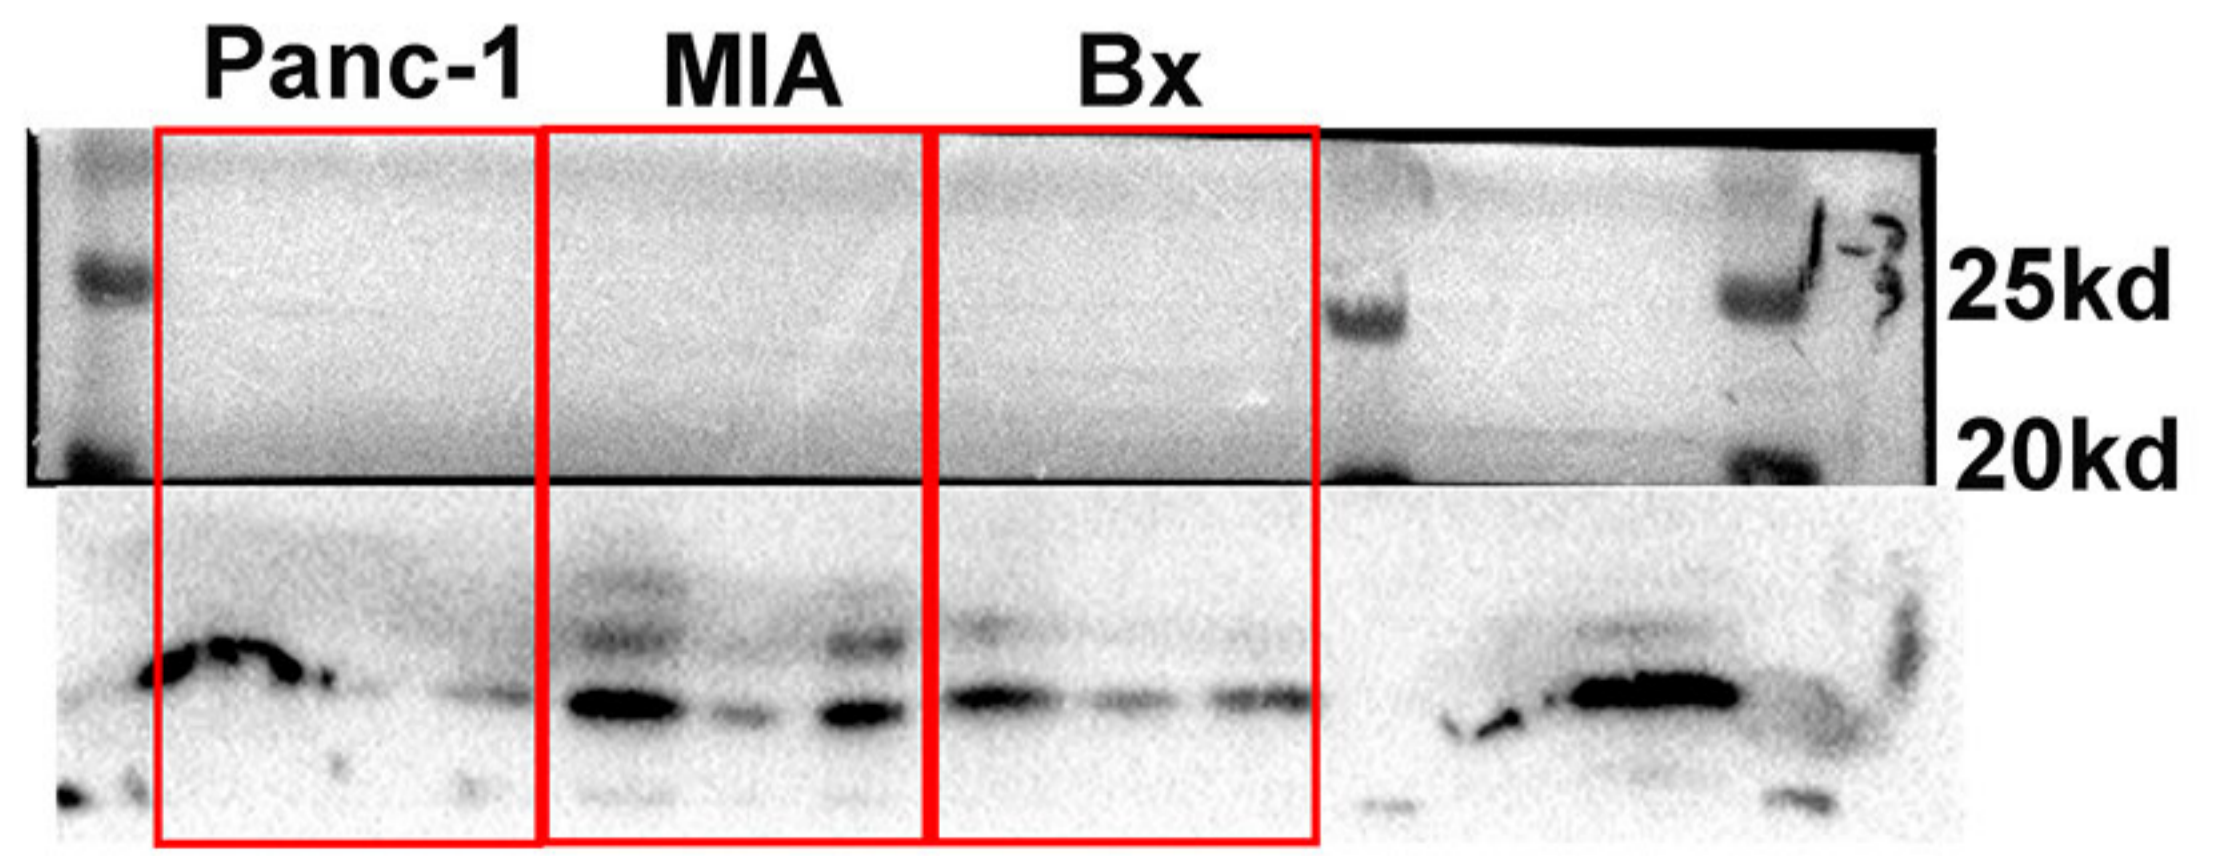

**Fig 5E**

**FOXM1**

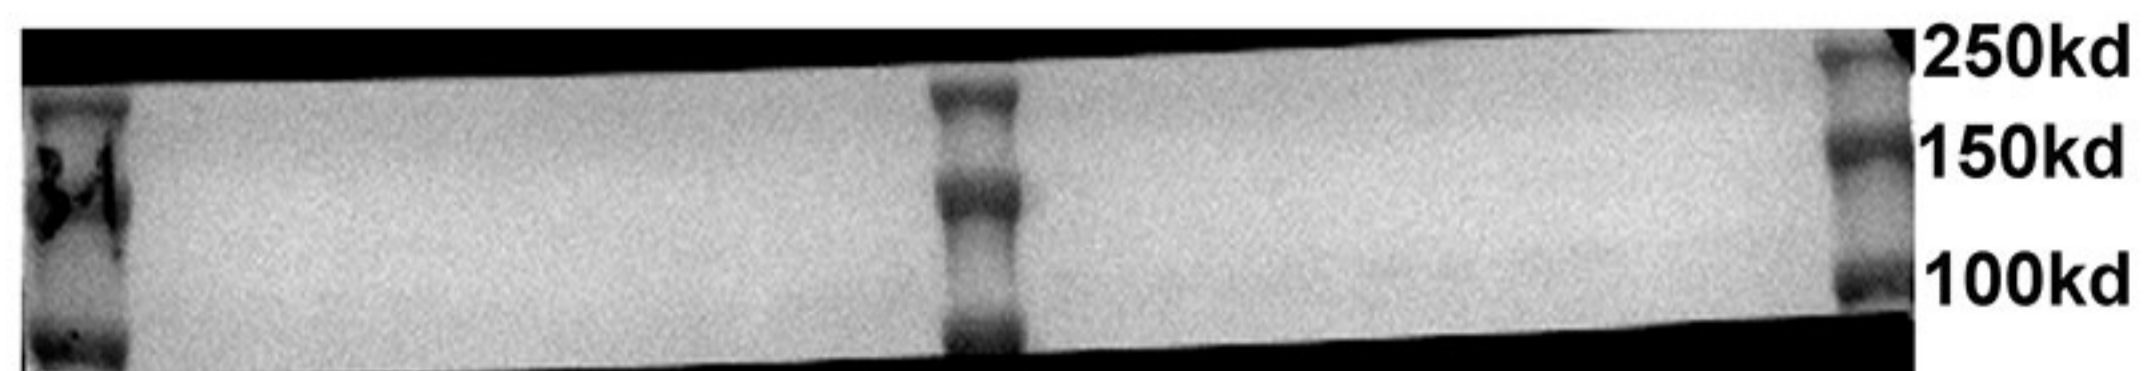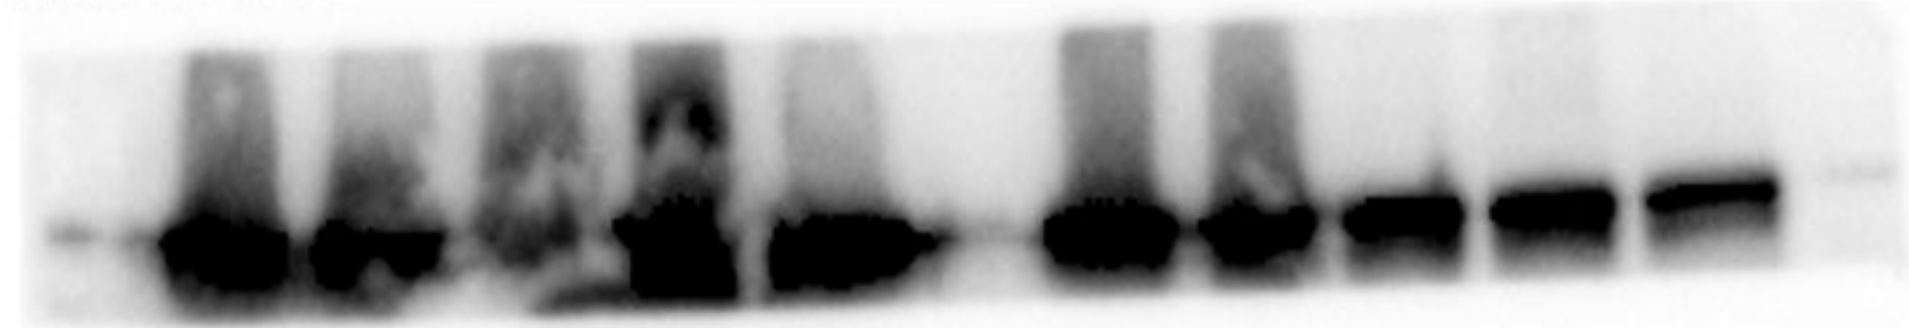

**STAT3**

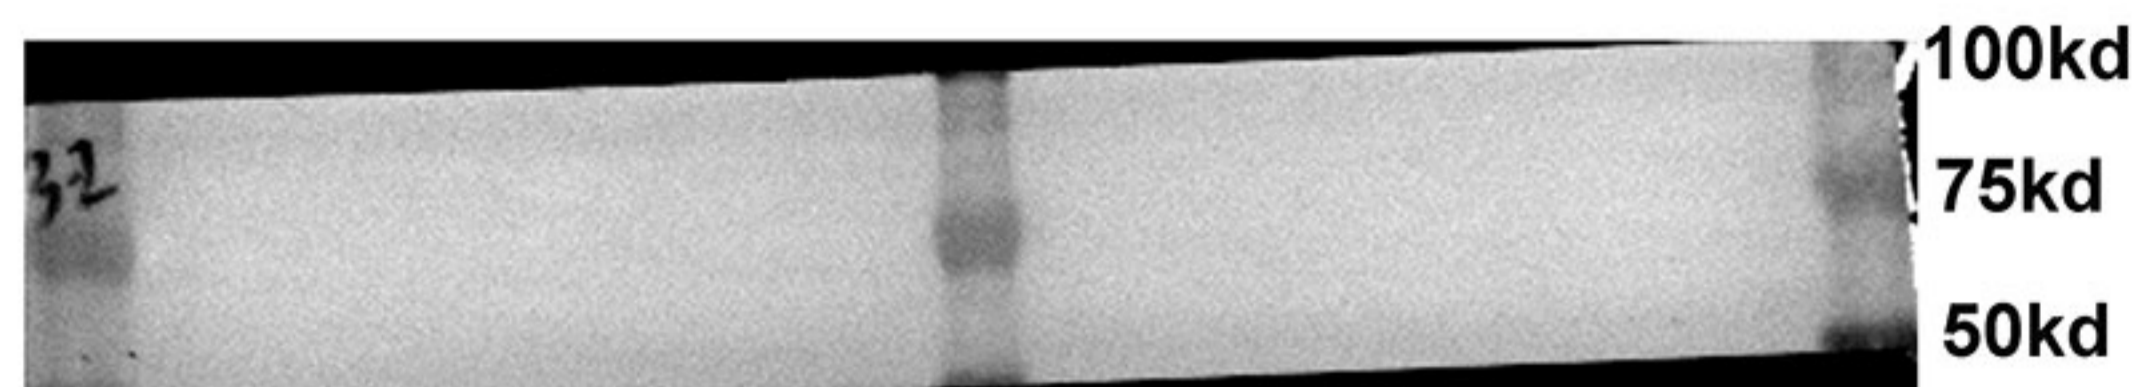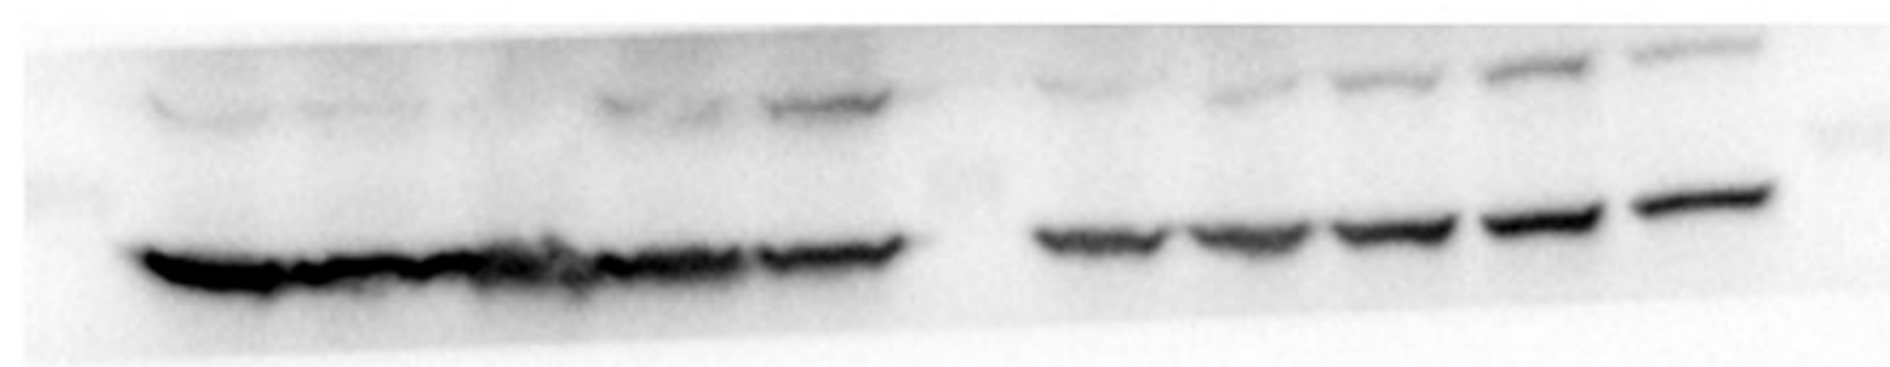

**$\beta$ -Actin**

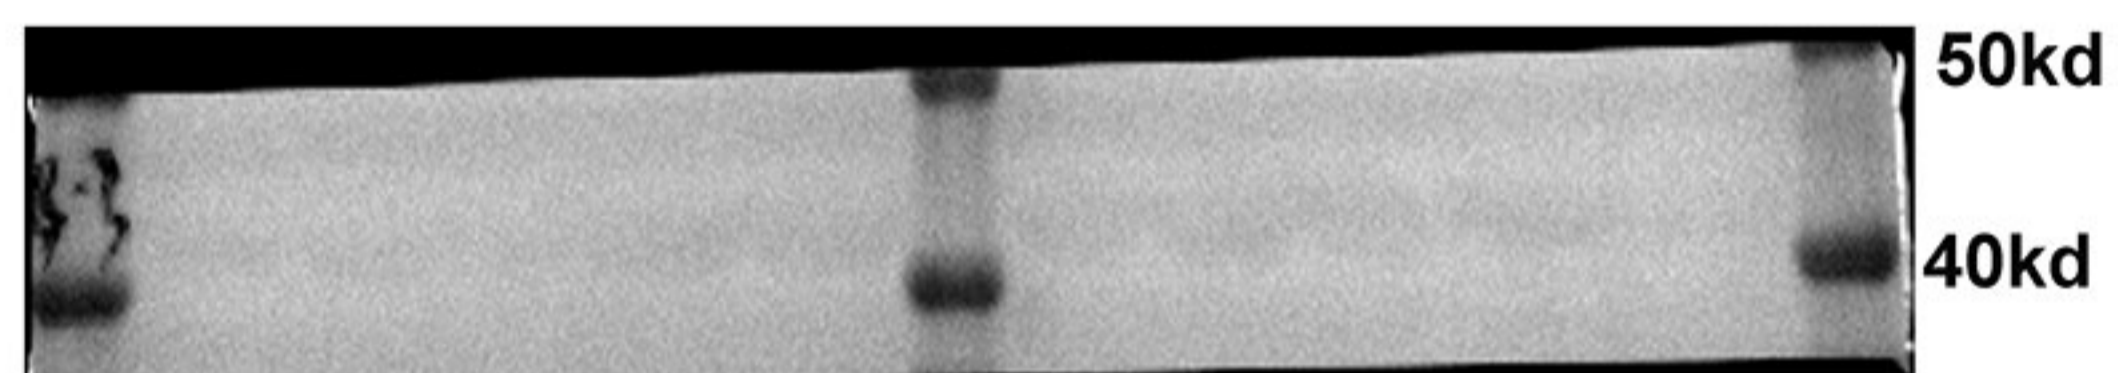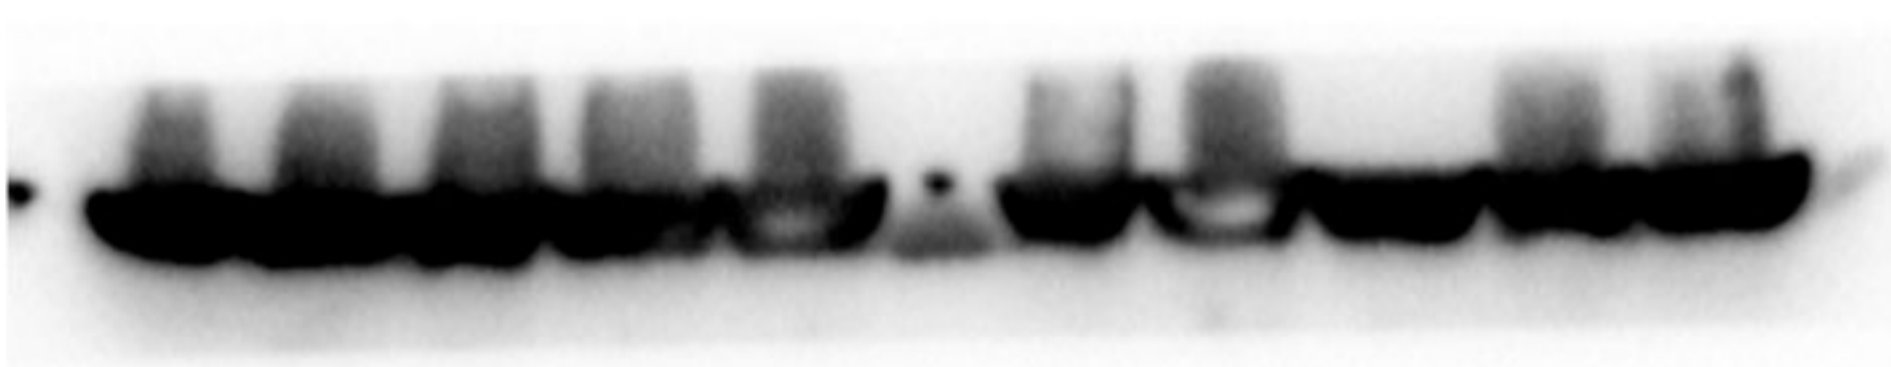

**GPX4**

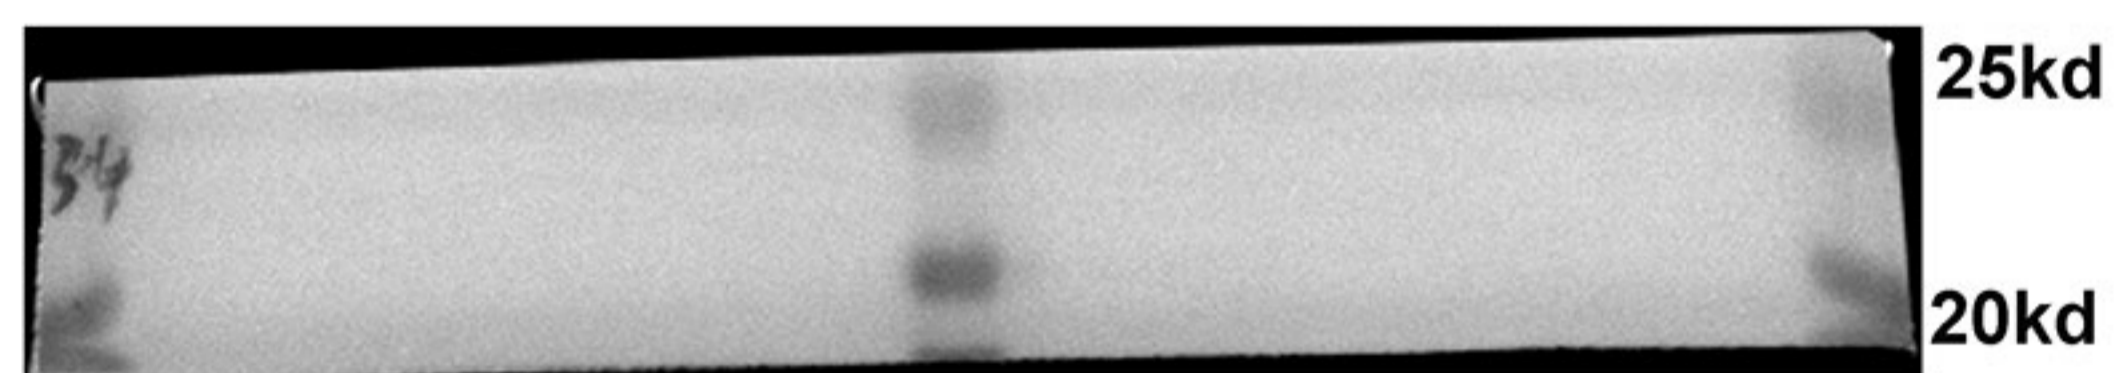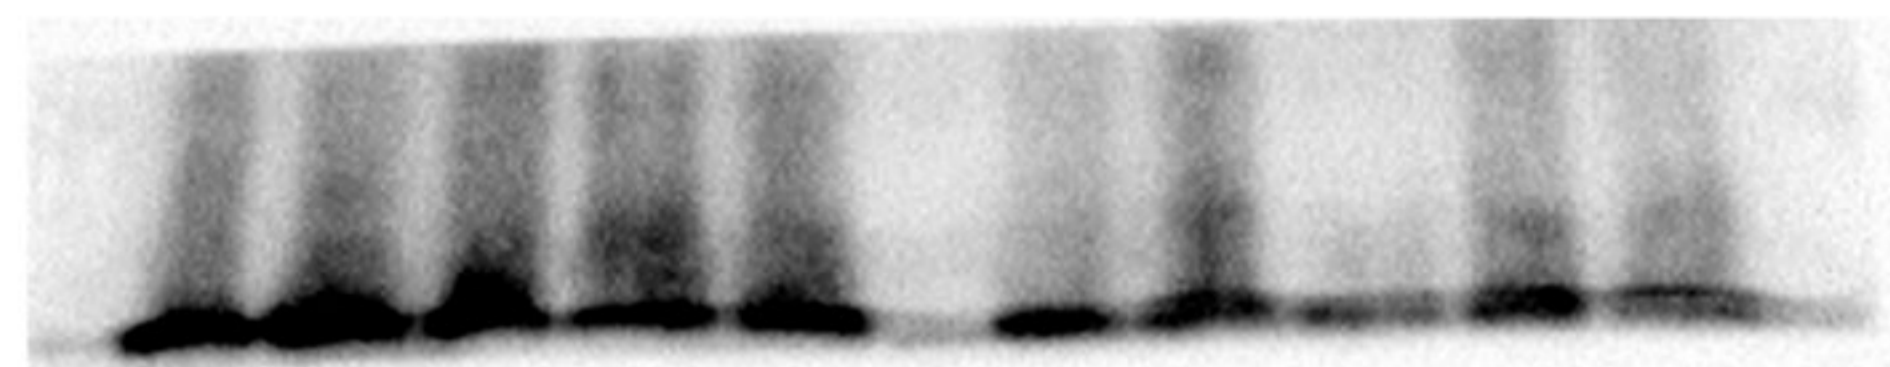

**p-STAT3**

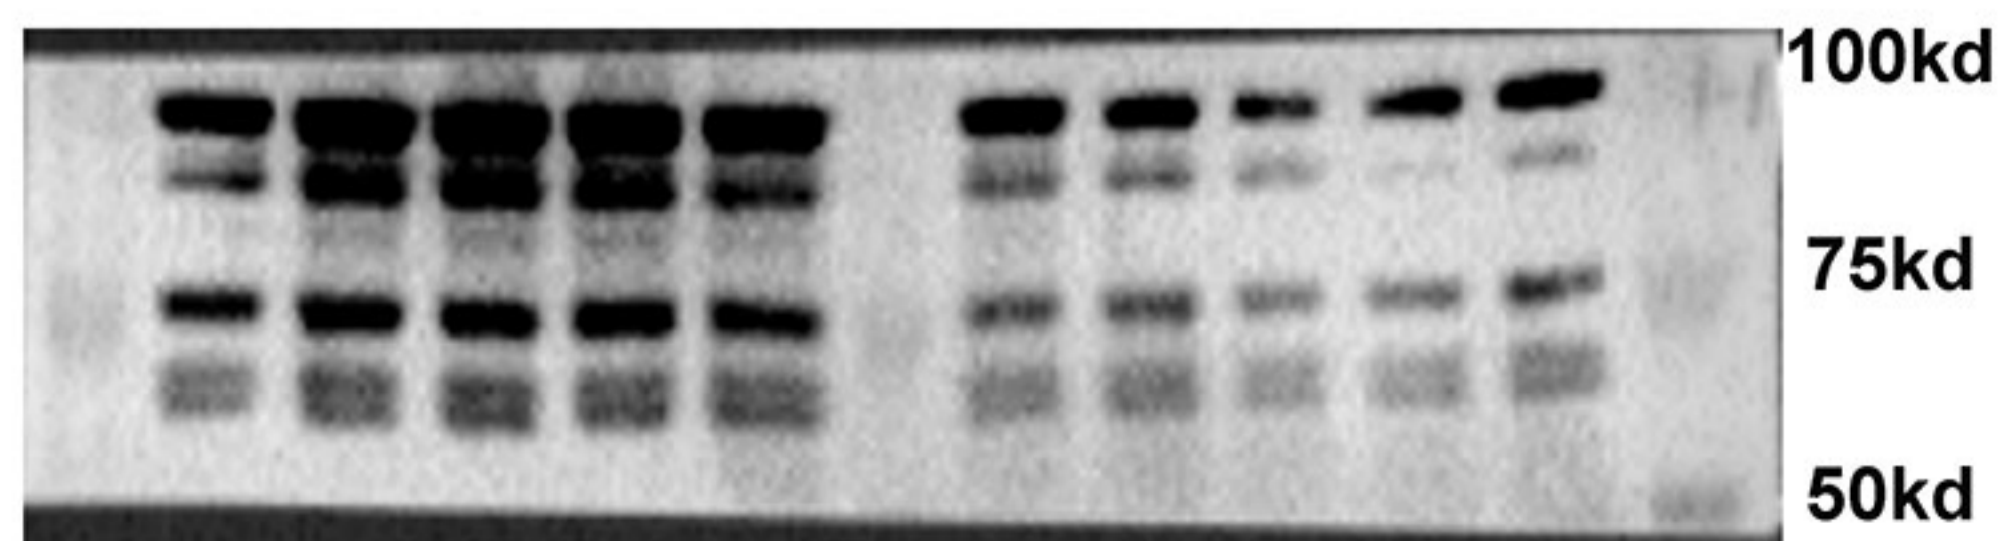

Supplement: 41419_2022_5082_MOESM4_ESM.pdf [file 41419_2022_5082_MOESM4_ESM.pdf]
